# Supplementary material for: Synthesis-dependent microhomology-mediated end joining accounts for multiple types of repair junctions
Source: PubMed Central journal article supplement — Nucleic Acids Res. 2010 May 11;38(17):5706–17. doi: 10.1093/nar/gkq379 (PMC2943611; doi:10.1093/nar/gkq379), 2010-05-11
Supplement: supp_gkq379_Supplemental_figures_and_tables.pdf [file supp_gkq379_Supplemental_figures_and_tables.pdf]

Figure S1

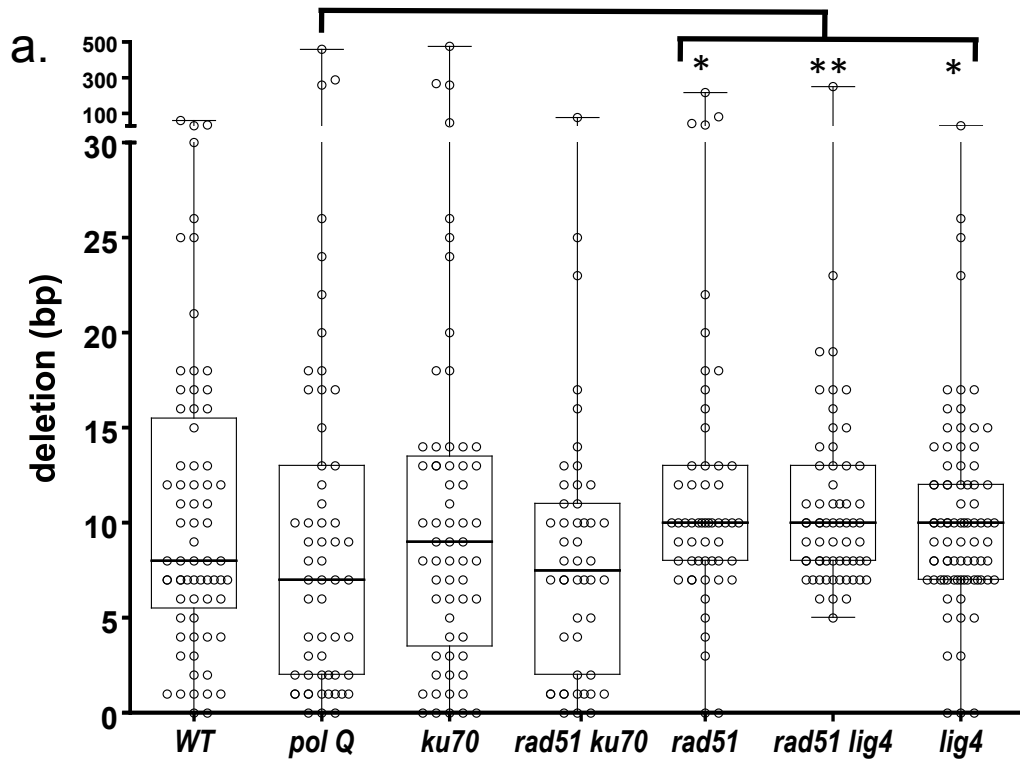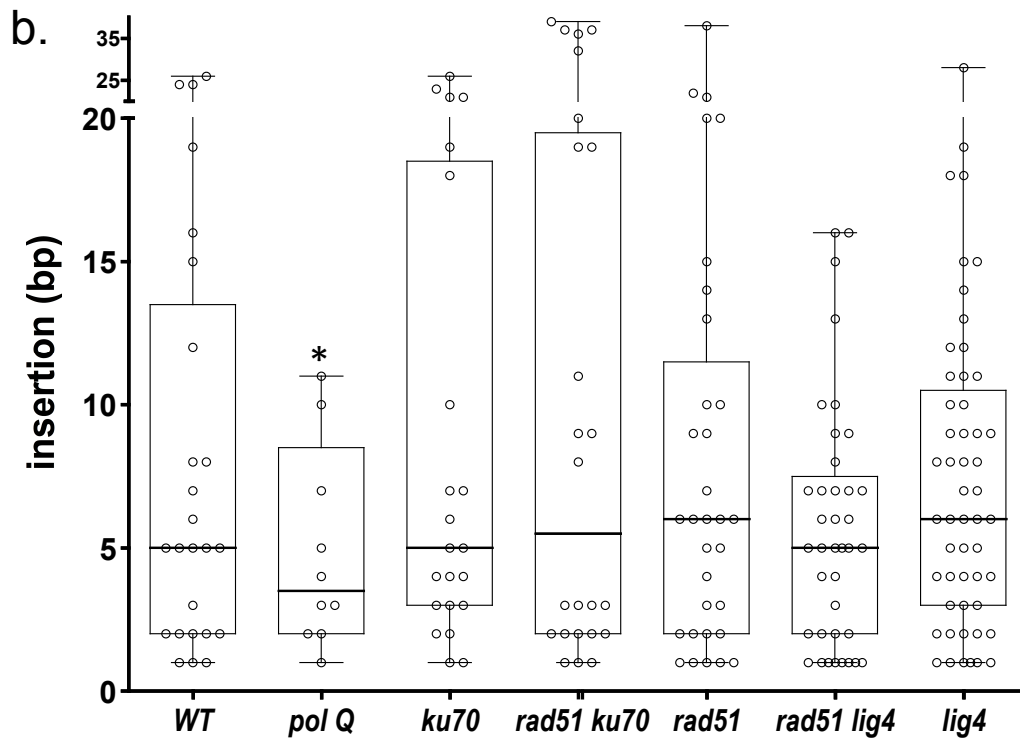

**Figure S1. Size of deletions and insertions is not affected by C-NHEJ deficiency.**

**a.** Box and whisker / scatter plots showing distribution of deletion sizes by genotype. Each circle represents one sequence. Bold horizontal lines indicate medians. The median deletion size in WT (8 bp) is not significantly different from the median net deletion in any other genotype assayed. The median deletion size in *polQ* mutants is significantly smaller than that in *rad51* ( $p=0.01$ ), *rad51 lig4* ( $p<0.01$ ), and *lig4* ( $p=0.02$ ) flies (2-tailed Mann-Whitney test). This is consistent with *polQ* mutants less frequently resecting to repeats that could be used for SD-MMEJ. WT  $n=70$ ; *pol Q*  $n=57$ ; *ku70*  $n=62$ ; *rad51 ku70*  $n=48$ ; *rad51*  $n=55$ ; *rad51 lig4*  $n=63$ ; *lig4*  $n=83$ .

**b.** Box and whisker / scatter plot of sizes of net insertions at end-joining repair junctions by genotype. Bold horizontal lines indicate medians. Genetic background did not significantly affect median insertion length ( $p=0.7$ , Kruskal-Wallis test). Variance of insertion lengths is significantly decreased relative to wild-type in *polQ* mutants ( $p=0.05$ , Levene's Test).

Figure S2

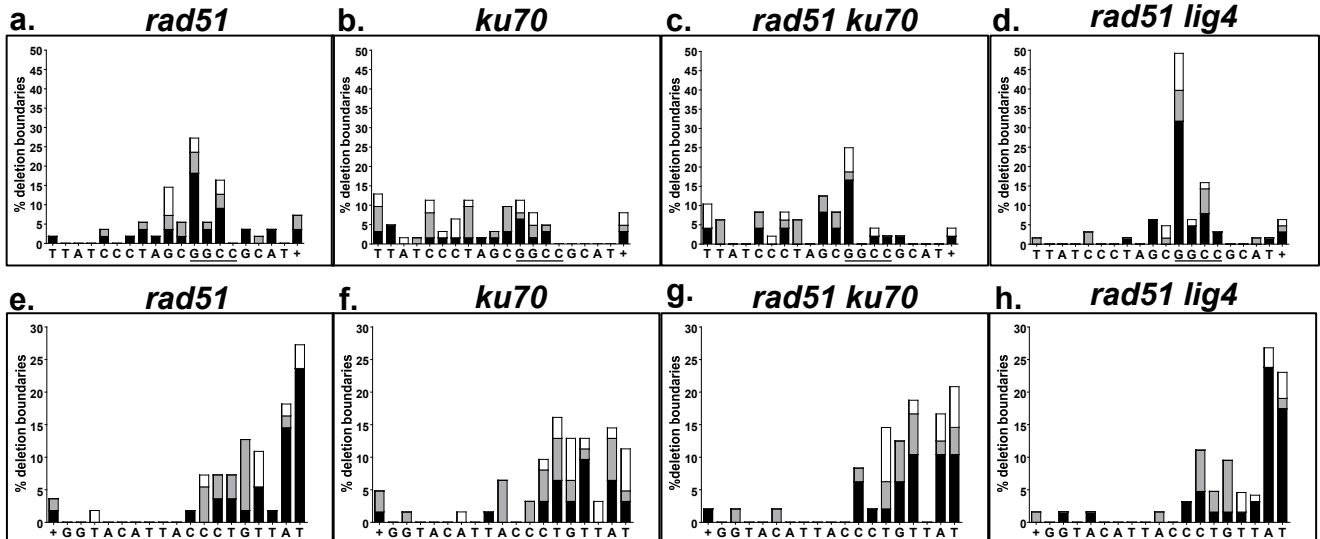

**Figure S2. Combined effects of sequence context and genotype on deletion boundary frequency.**

Histograms show right (a-d) and left (e-h) deletion boundaries in *rad51*, *ku70*, *rad51 ku70*, and *rad51 lig4* genetic backgrounds. Histograms show frequency, as percentage of total repair products, of deletion boundaries associated with net insertions (black), junctional microhomologies (gray) and apparent blunt joins (white). "Deletion boundary" is defined as the position (including junctional microhomologies, if any) at which an uninterrupted match between the original [lw] sequence and the repair junction resumes. X axis indicates the top strand sequence. Deletions extending beyond the sequence depicted are represented by a plus sign (+).

## Figure S3

**a.**

```

TCGGTACATTACCCTGTaccctGCCGCATAGGCCACTAGT
AATTCGGTACATTACCCataGGCCGCATAGGCCACTAGTGG
GTACATTACCCTGTTATaacagGGCCGCATAGGCCACTAGT
GTACATTACCCTGTTATagtGGCCGCATAGGCCACTAGTGG
  
```

**b.**

|                 |                                       |                                                                |
|-----------------|---------------------------------------|----------------------------------------------------------------|
| <b>original</b> | CGGTACAT <u>T</u> accct <u>GT</u> TAT | CCCTAGC <u>G</u> GCCGCATA                                      |
| <b>repaired</b> | CGGTACAT <u>T</u> accct <u>GT</u> --- | - <u>accct</u> - <u>G</u> GCCGCATA                             |
|                 |                                       |                                                                |
| <b>original</b> | ATTACC <u>C</u> TGTTAT                | CCCTAGC <u>GGCC</u> <u>G</u> ata <u>GGCC</u> AC                |
| <b>repaired</b> | ATTACC <u>C</u> -- <u>ata</u> -       | ----- <u>GGCC</u> <u>G</u> ata <u>GGCC</u> AC                  |
|                 |                                       |                                                                |
| <b>original</b> | CGGTACATTA <u>CC</u> ctggt <u>AT</u>  | CCCTAGC <u>GG</u> CCGCATA                                      |
| <b>repaired</b> | CGGTACATTA <u>CC</u> ctggt <u>AT</u>  | - <u>aacag</u> - <u>GG</u> CCGCATA                             |
|                 |                                       |                                                                |
| <b>original</b> | CCCTGTTA <u>T</u>                     | CCCTAGC <u>GGCC</u> GCATA <u>GGCC</u> act <u>A</u> GT          |
| <b>repaired</b> | CCCTGTTA <u>T</u>                     | -- <u>agt</u> -- <u>GGCC</u> GCATA <u>GGCC</u> act <u>A</u> GT |

**Figure S3. Structure of indels formed by repair events includes characteristic patterns of short repeats present in the original sequence.** Additional examples illustrating the patterns described in the caption to Figure 4. Sequences are (top to bottom) Supplemental Table S7 sequence 31; Supplemental Table S6 sequence 6; Supplemental Table 7 sequence 65; Supplemental Table S6 sequence 8.

## Figure S4

a. **step 1)** CCGTACATTACCCTGTTA ggcata GGCCGCATAGGCC ACTA  
**step 2)** CCGTACATTACCCTGT TAGgc ata GGCCGCATAGGCC ACTA

b. **step 1)** TACAT TACCCT GTTA Aggcta gt GGCCGCATAGGCCACTAGT  
**step 2)** TACATTACCCTGTTA ggg tagt GGCCGCATAGGCCACTAGT

c. **step 1)** TACAT TACCCTGTTA acagggta GGCCGCATAGGCCACTAG  
**step 2)** TACATTACCCTGTTA acaggg ta GGCCGCATAGGCC ACTAG

d.

|    |                                                                                                                                                                                                                                                                       |                         |
|----|-----------------------------------------------------------------------------------------------------------------------------------------------------------------------------------------------------------------------------------------------------------------------|-------------------------|
| 1) | <span style="background-color: red; color: white; padding: 2px;">CGGTACATTA</span> CCCTGT <span style="border: 1px solid black; padding: 2px;">Gtacatta</span> cattacattacattacccggtacattatcca                                                                        | CTAGC (13bp) ACTAGTGGAT |
| 2) | <span style="background-color: red; color: white; padding: 2px;">CGGTACATTA</span> CCCTGT <span style="border: 1px solid black; padding: 2px;">acattacattacattacccggtacattatcca</span>                                                                                | CTAGC (13bp) ACTAGTGGAT |
| 3) | <span style="background-color: red; color: white; padding: 2px;">CGGTACATTA</span> CCCTGT <span style="border: 1px solid black; padding: 2px;">acattacattacattacccggtacattatcca</span>                                                                                | CTAGC (13bp) ACTAGTGGAT |
| 4) | <span style="background-color: red; color: white; padding: 2px;">CGGTACATTA</span> CCCTGT <span style="border: 1px solid black; padding: 2px;">acattacattacattacccggtacattatcca</span>                                                                                | CTAGC (13bp) ACTAGTGGAT |
| 5) | <span style="background-color: red; color: white; padding: 2px;">CGGTACATTACCC</span> TGT <span style="border: 1px solid black; padding: 2px;">acattacattacattacattacc</span> <span style="background-color: red; color: white; padding: 2px;">cgggtacattatcca</span> | CTAGC (13bp) ACTAGTGGAT |
| 6) | <span style="background-color: red; color: white; padding: 2px;">CGGTACATTA</span> CCCTGT <span style="border: 1px solid black; padding: 2px;">acattacattacattacattacc</span> <span style="background-color: red; color: white; padding: 2px;">cgggtacattatcca</span> | CTAGC (13bp) ACTAGTGGAT |
| 7) | <span style="background-color: red; color: white; padding: 2px;">CGGTACATTACCC</span> TGT <span style="border: 1px solid black; padding: 2px;">acattacattacattacattacc</span> <span style="border: 1px solid black; padding: 2px;">cgggtacattatcca</span>             | CTAGC (13bp) ACTAGTGGAT |

e.

|    |                                                                                                                                                                                                                                                                                                                                                                                                                                                                |                    |
|----|----------------------------------------------------------------------------------------------------------------------------------------------------------------------------------------------------------------------------------------------------------------------------------------------------------------------------------------------------------------------------------------------------------------------------------------------------------------|--------------------|
| 1) | <span style="background-color: blue; color: white; padding: 2px;">CATTACCCTGTTAT</span> <span style="border: 1px solid black; padding: 2px;">Aaat</span> tataaattataattattatagt                                                                                                                                                                                                                                                                                | GGCCGCATAGGCCACTAG |
| 2) | <span style="background-color: blue; color: white; padding: 2px;">CATTACCCTGTTAT</span> <span style="border: 1px solid black; padding: 2px;">Aaattataa</span> ttataaattattatagt                                                                                                                                                                                                                                                                                | GGCCGCATAGGCCACTAG |
| 3) | <span style="background-color: blue; color: white; padding: 2px;">CATTACCCTGTTAT</span> <span style="border: 1px solid black; padding: 2px;">Aaattataa</span> <span style="border: 1px solid black; padding: 2px;">ttataa</span> ttattatagt                                                                                                                                                                                                                    | GGCCGCATAGGCCACTAG |
| 4) | <span style="background-color: blue; color: white; padding: 2px;">CATTACCCTGTTAT</span> <span style="border: 1px solid black; padding: 2px;">Aaattataa</span> <span style="border: 1px solid black; padding: 2px;">tataattat</span> tatagt                                                                                                                                                                                                                     | GGCCGCATAGGCCACTAG |
| 5) | <span style="background-color: blue; color: white; padding: 2px;">CATTACCCTGTTAT</span> <span style="border: 1px solid black; padding: 2px;">Aaattataa</span> <span style="border: 1px solid black; padding: 2px;">tataa</span> <span style="border: 1px solid black; padding: 2px;">ttata</span> gt                                                                                                                                                           | GGCCGCATAGGCCACTAG |
| 6) | <span style="background-color: blue; color: white; padding: 2px;">CATTACCCTGTTAT</span> <span style="border: 1px solid black; padding: 2px;">Aaattataa</span> <span style="border: 1px solid black; padding: 2px;">tataa</span> <span style="border: 1px solid black; padding: 2px;">ttata</span> <span style="border: 1px solid black; padding: 2px;">tagt</span> <span style="background-color: blue; color: white; padding: 2px;">GGCCGCATAGGCCACTAG</span> |                    |

**Figure S4. Repair product sequences consistent with multi-step SD-MMEJ.**

Repair by multi-step SD-MMEJ produces repair products that can be "dissected" into an uninterrupted series of overlapping direct and/or inverted repeats spanning the insertion and flanking sequence on both sides. Only top strands (3'-5') shown. Notational conventions as described in Figures 5 and 6.

**a.** SD-MMEJ by two sequential rounds of direct (loop-out) synthesis from the right side of the DSB. *Step 1:* Bottom strand at leftmost GGCC (red, underlined) anneals to the top strand at the right-hand GGCC (white on red). GCATA (white on red) templates synthesis resulting in 3'-CG... (bottom strand, not shown).

*Step 2:* The 3' CG base-pairs with the leftmost GC in TAGGC (white on red). TAG (white on red) templates synthesis producing 3'-AT... (bottom strand, not shown) which anneals to the top strand TA on the other side of the DSB (red, underlined, capitalized). Sequence shown is sequence 113 in table S8.

**b.** SD-MMEJ repair via snap-back synthesis on each side of the DSB. *Step 1:* Terminal base A of the 3' end to the left of the DSB (blue, capitalized, underlined) anneals to T four bp to the left (white on blue). Primer extension and dissociation result in a single stranded 3' end with newly synthesized sequence gggta (blue, lowercase, underlined). *Step 2:* The 3' CCGG (complementary to blue underlined GGCC) snaps back and anneals to GGCC (white on blue). ACTA (white on blue) templates synthesis of 5'...TGAT-3' (bottom strand, not shown), which has two bp of microhomology to the 3' end produced in Step 1. Sequence shown is sequence 114 in table S8.

**c.** SD-MMEJ repair with snap-back synthesis on the left DSB end and loop-out synthesis on the right. Sequence shown is sequence 11 in table S8.

**d.** Repair product with a long insertion consistent with repair by six iterative rounds of loop-out SD-MMEJ on the right side of the DSB and a single round of snap-back synthesis on the left. Sequence shown is sequences 93 and 94 in table S8.

**e.** Repair product with a long insertion consistent with repair by five iterative rounds of snap-back SD-MMEJ on the left side of the DSB and one round of snap-back SD-MMEJ on the right. Self-complementarity of the insertion suggests that newly synthesized sequence was subsequently used as a template. Sequence shown is sequence 8 in table S8.

Figure S5

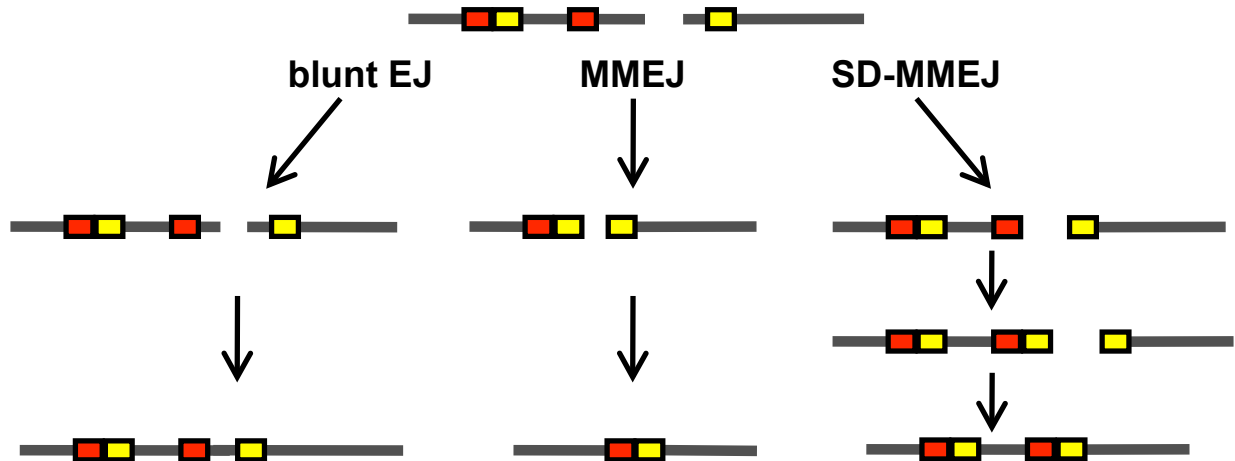

**Figure S5. SD-MMEJ events without insertions can be distinguished from true blunt joins by repair product structure.**

Deletions associated with true blunt joins (left) do not correlate with any short repeats present in the repair product and do not create longer repeats at the apparent point of ligation. SD-MMEJ events where the template for the newly synthesized microhomology is adjacent to the primer (right) do not produce net insertions, but do create a repeat where one instance of the repeated motif contains the point of ligation. Identically colored boxes represent direct repeats.

Figure S6

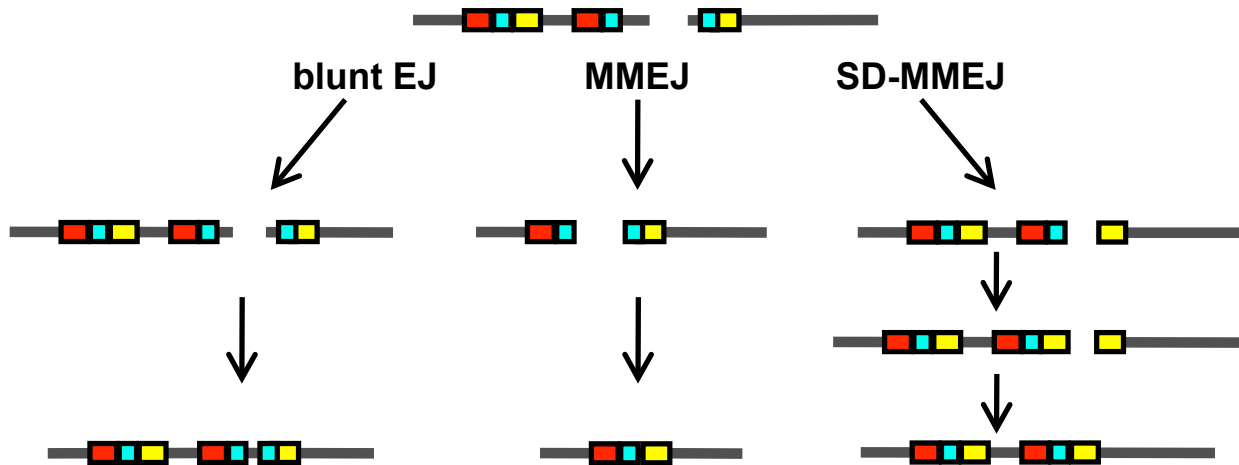

**Figure S6. SD-MMEJ events can be distinguished from MMEJ at pre-existing microhomologies by repair product structure.**

Deletions associated with true blunt joins (left) do not correlate with any short repeats present in the repair product and do not create longer repeats at the apparent point of ligation. MMEJ at pre-existing direct repeats (center) does not create a longer repeated motif. SD-MMEJ event (right) can create a junction that is locally indistinguishable from MMEJ at pre-existing microhomologies, but unlike MMEJ at pre-existing microhomologies, creates a longer repeated motif. Identically colored boxes represent direct repeats.



**Table S1.**

|                          | <b>mean<br/>(bp)</b> | <b>median<br/>(bp)</b> |
|--------------------------|----------------------|------------------------|
| <b>WT</b>                | 1.8                  | 2.0                    |
| <b><i>polQ</i></b>       | 1.9                  | 2.0                    |
| <b><i>ku70</i></b>       | 2.0                  | 2.0                    |
| <b><i>rad51 ku70</i></b> | 1.6                  | 1.0                    |
| <b><i>rad51</i></b>      | 1.8                  | 1.0                    |
| <b><i>rad51 lig4</i></b> | 2.1                  | 2.0                    |
| <b><i>lig4</i></b>       | 1.9                  | 1.0                    |

**Supplemental Table S1. Mean and median junctional microhomology lengths by genotype**

Mean and median junctional microhomology length by genotype. Genetic background has no significant effect on either the mean ( $p=0.91$ , one-way ANOVA) or the median ( $p=0.85$ , Kruskal-Wallis test) junctional microhomology length.

Table S2.

| original [lw] sequence                                                                      | repair product                                                                     |
|---------------------------------------------------------------------------------------------|------------------------------------------------------------------------------------|
| CCCT <sub>G</sub> TTAT <sup> </sup> CCCTAGC <sub>G</sub> GCCGCATAGGCCACT                    | ATTACCCT <sub>T</sub> . <u>G</u> .GCCGCATAGGCCACT (19) <sup>A</sup>                |
| CGGTACATTACCCT <sub>TG</sub> TTAT <sup> </sup> CCCTAGCGGCCGCATA                             | AATTCGGTACATT <sub>TA</sub> .CCCT <sub>T</sub> AGCGGC (15) <sup>B</sup>            |
| TCGGTACATTACCCT <sub>TG</sub> TTAT <sup> </sup> CCCTAGCGG <sub>CCG</sub>                    | AATTCGGTACAT <sub>TAC</sub> .CCGCATAGG (10) <sup>D</sup>                           |
| TACATTACCCT <sub>G</sub> TTAT <sup> </sup> CCCTAG <sub>G</sub> CGGCCGCATA                   | ACATTACCCT <sub>T</sub> .G.CGGCGGCATAGGC (9) <sup>E</sup>                          |
| TACATTACC <sub>CTG</sub> TTAT <sup> </sup> CCCTAG <sub>G</sub> GCCGCATA                     | CGGTACATTACC <sub>T</sub> CGGCCGCATAGG (7)                                         |
| T <sub>CGGT</sub> ACATTACC <sub>CTG</sub> TTAT <sup> </sup> CCCTAGCGG <sub>CCG</sub>        | CCGAATT <sub>CGGT</sub> ACAT <sub>TA</sub> .CCGCATA (6) <sup>F</sup>               |
| TACA <sub>TTA</sub> CCCTG <sub>TTA</sub> TTAT <sup> </sup> CCCTAGCGGCCGCATA                 | CGGTACA <sub>T</sub> TTA <sub>T</sub> TCCCTAGCGGCCGC (6)                           |
| TACATTACC <sub>CTG</sub> TTAT <sup> </sup> CCCTAGCGGCCGCATA                                 | GTACATTA <sub>CCC</sub> .T.TAT <sub>CCCT</sub> AGCGG (4) <sup>G</sup>              |
| TACATTACCCT <sub>G</sub> TTAT <sup> </sup> CCCTAGCGGCCGCATA                                 | GGTACATTACCCT <sub>T</sub> CGGCATAGGC (4)                                          |
| CGGTACATTACCCT <sub>TG</sub> TTAT <sup> </sup> CCCTAGCGGCCGCATA                             | ATTCGGTACATTACCCT <sub>TG</sub> .T <sub>T</sub> ATCCC (3) <sup>H</sup>             |
| CATTACCCTG <sub>T</sub> TTAT <sup> </sup> CCCTAGCGGCCGC <sub>ATAGG</sub>                    | CCTGT <sub>TA</sub> .T <sub>T</sub> AGCGGCCGC <sub>ATAG</sub> GCC (3) <sup>I</sup> |
| AGCCGAATT <sub>CGGT</sub> ACATTACCCTG <sub>T</sub> TTAT <sup> </sup> CCCTAG <sub>CGGC</sub> | AGCAGCCGAATT <sub>T</sub> .CGG.CCGCATAGG (3) <sup>J</sup>                          |

**Supplemental Table S2. The SD-MMEJ model explains bias in frequency of specific junctional microhomologies.**

The most frequently observed junctional microhomology (top row) is consistent with SD-MMEJ repair with a 4 bp direct/inverted repeat as a primer (Compare Figure 3a-c). Junctional microhomologies not consistent with SD-MMEJ are not highlighted. Number of times a sequence was independently recovered is indicated in parentheses. Positions of bottom and top strand nicks in the original sequence indicated by subscripted/superscripted vertical lines. Microhomologies are indicated in the original sequence as white on black with dotted underlines. Blue and red boxed/underlined repeated motifs are SD-MMEJ consistent. Lettered superscripts cross-reference Table S4.

**Table S3.**

|                   | sequences of apparent blunt joins<br>□ indicates deleted sequence                        |                 | genotype                       | deln (bp) |
|-------------------|------------------------------------------------------------------------------------------|-----------------|--------------------------------|-----------|
| 1 <sup>A1</sup>   | GCAGCCGAATTCGGTACATTACCCTGTTAT□GGCCGCATA <u>GGCCA</u> CTAGTGGATCTGGATC                   | I <sup>1</sup>  | WT <sup>1</sup>                | 7         |
| 2 <sup>A2</sup>   | GCAGCCGAATTCGGTACATTACCCTGTTAT□GGCCGCATA <u>GGCCA</u> CTAGTGGATCTGGATC                   | I <sup>2</sup>  | WT <sup>2</sup>                | 7         |
| 3 <sup>A3</sup>   | GCAGCCGAATTCGGTACATTACCCTGTTAT□GGCCGCATA <u>GGCCA</u> CTAGTGGATCTGGATC                   | I <sup>3</sup>  | WT <sup>3</sup>                | 7         |
| 4 <sup>A4</sup>   | GCAGCCGAATTCGGTACATTACCCTGTTAT□GGCCGCATA <u>GGCCA</u> CTAGTGGATCTGGATC                   | I <sup>4</sup>  | WT <sup>4</sup>                | 7         |
| 5 <sup>A5</sup>   | GCAGCCGAATTCGGTACATTACCCTGTTAT□GGCCGCATA <u>GGCCA</u> CTAGTGGATCTGGATC                   | I <sup>5</sup>  | <i>ku70</i> <sup>1</sup>       | 7         |
| 6 <sup>A6</sup>   | GCAGCCGAATTCGGTACATTACCCTGTTAT□GGCCGCATA <u>GGCCA</u> CTAGTGGATCTGGATC                   | I <sup>6</sup>  | <i>lig4</i> <sup>1</sup>       | 7         |
| 7 <sup>A7</sup>   | GCAGCCGAATTCGGTACATTACCCTGTTAT□GGCCGCATA <u>GGCCA</u> CTAGTGGATCTGGATC                   | I <sup>7</sup>  | <i>rad51 ku70</i> <sup>1</sup> | 7         |
| 8 <sup>A8</sup>   | GCAGCCGAATTCGGTACATTACCCTGTTAT□GGCCGCATA <u>GGCCA</u> CTAGTGGATCTGGATC                   | I <sup>8</sup>  | <i>rad51 ku70</i> <sup>2</sup> | 7         |
| 9 <sup>A9</sup>   | GCAGCCGAATTCGGTACATTACCCTGTTAT□GGCCGCATA <u>GGCCA</u> CTAGTGGATCTGGATC                   | I <sup>9</sup>  | <i>rad51 lig4</i> <sup>1</sup> | 7         |
| 10 <sup>A10</sup> | GCAGCCGAATTCGGTACATTACCCTGTTAT□GGCCGCATA <u>GGCCA</u> CTAGTGGATCTGGATC                   | I <sup>10</sup> | <i>rad51 lig4</i> <sup>2</sup> | 7         |
| 11 <sup>A11</sup> | GCAGCCGAATTCGGTACATTACCCTGTTAT□GGCCGCATA <u>GGCCA</u> CTAGTGGATCTGGATC                   | I <sup>11</sup> | <i>polQ</i> <sup>1</sup>       | 7         |
| 12 <sup>B1</sup>  | GCAGCAGCCGAATTCGGTACATTACCCTGT□GGCCGCATA <u>GGCCA</u> CTAGTGGATCTGGATC                   | I <sup>12</sup> | WT <sup>5</sup>                | 10        |
| 13 <sup>B2</sup>  | GCAGCAGCCGAATTCGGTACATTACCCTGT□GGCCGCATA <u>GGCCA</u> CTAGTGGATCTGGATC                   | I <sup>13</sup> | <i>rad51</i> <sup>1</sup>      | 10        |
| 14 <sup>B3</sup>  | GCAGCAGCCGAATTCGGTACATTACCCTGT□GGCCGCATA <u>GGCCA</u> CTAGTGGATCTGGATC                   | I <sup>14</sup> | <i>ku70</i> <sup>2</sup>       | 10        |
| 15 <sup>B4</sup>  | GCAGCAGCCGAATTCGGTACATTACCCTGT□GGCCGCATA <u>GGCCA</u> CTAGTGGATCTGGATC                   | I <sup>15</sup> | <i>lig4</i> <sup>2</sup>       | 10        |
| 16 <sup>B5</sup>  | GCAGCAGCCGAATTCGGTACATTACCCTGT□GGCCGCATA <u>GGCCA</u> CTAGTGGATCTGGATC                   | I <sup>16</sup> | <i>lig4</i> <sup>3</sup>       | 10        |
| 17 <sup>B6</sup>  | GCAGCAGCCGAATTCGGTACATTACCCTGT□GGCCGCATA <u>GGCCA</u> CTAGTGGATCTGGATC                   | I <sup>17</sup> | <i>lig4</i> <sup>4</sup>       | 10        |
| 18 <sup>B7</sup>  | GCAGCAGCCGAATTCGGTACATTACCCTGT□GGCCGCATA <u>GGCCA</u> CTAGTGGATCTGGATC                   | I <sup>18</sup> | <i>rad51 lig4</i> <sup>3</sup> | 10        |
| 19 <sup>B8</sup>  | GCAGCAGCCGAATTCGGTACATTACCCTGT□GGCCGCATA <u>GGCCA</u> CTAGTGGATCTGGATC                   | I <sup>19</sup> | <i>rad51 lig4</i> <sup>4</sup> | 10        |
| 20 <sup>B9</sup>  | GCAGCAGCCGAATTCGGTACATTACCCTGT□GGCCGCATA <u>GGCCA</u> CTAGTGGATCTGGATC                   | I <sup>20</sup> | <i>rad51 lig4</i> <sup>5</sup> | 10        |
| 21 <sup>B10</sup> | GCAGCAGCCGAATTCGGTACATTACCCTGT□GGCCGCATA <u>GGCCA</u> CTAGTGGATCTGGATC                   | I <sup>21</sup> | <i>polQ</i> <sup>2</sup>       | 10        |
| 22 <sup>C1</sup>  | AGCAGCCGAATTCGGTACA <u>TTACCC</u> TG <u>TTA</u> □ <u>CCC</u> TAGCGGCCGCATAGGCCACTAGTGGAT | II <sup>1</sup> | WT <sup>6</sup>                | 1         |
| 23 <sup>C2</sup>  | AGCAGCCGAATTCGGTACA <u>TTACCC</u> TG <u>TTA</u> □ <u>CCC</u> TAGCGGCCGCATAGGCCACTAGTGGAT | II <sup>2</sup> | WT <sup>7</sup>                | 1         |
| 24 <sup>C3</sup>  | AGCAGCCGAATTCGGTACA <u>TTACCC</u> TG <u>TTA</u> □ <u>CCC</u> TAGCGGCCGCATAGGCCACTAGTGGAT | II <sup>3</sup> | <i>ku70</i> <sup>3</sup>       | 1         |
| 25 <sup>C4</sup>  | AGCAGCCGAATTCGGTACA <u>TTACCC</u> TG <u>TTA</u> □ <u>CCC</u> TAGCGGCCGCATAGGCCACTAGTGGAT | II <sup>4</sup> | <i>polQ</i> <sup>3</sup>       | 1         |
| 26 <sup>D1</sup>  | AGCAGCCGAATTCGGTACATTACCCTGTTA□GGCCGCATA <u>GGCCA</u> CTAGTGGATCTGGATC                   | I <sup>22</sup> | <i>lig4</i> <sup>5</sup>       | 8         |
| 27 <sup>D2</sup>  | AGCAGCCGAATTCGGTACATTACCCTGTTA□GGCCGCATA <u>GGCCA</u> CTAGTGGATCTGGATC                   | I <sup>23</sup> | <i>rad51 ku70</i> <sup>3</sup> | 8         |

|                  |                                                                              |                  |                                 |     |
|------------------|------------------------------------------------------------------------------|------------------|---------------------------------|-----|
| 28 <sup>D3</sup> | AGCAGCCGAATTCGGTACATTACCCTGTTA- <u>GGCCGCATAAGGCC</u> ACTAGTGGATCTGGATC      | I <sup>24</sup>  | <i>rad51 lig4</i> <sup>6</sup>  | 8   |
| 29 <sup>E1</sup> | GCAGCCGAATTCGGTACATTACCCTGTTAT- <u>CCGCATAGGCC</u> ACTAGTGGATCTGGATCCT       | -                | <i>rad51</i> <sup>2</sup>       | 9   |
| 30 <sup>E2</sup> | GCAGCCGAATTCGGTACATTACCCTGTTAT- <u>CCGCATAGGCC</u> ACTAGTGGATCTGGATCCT       | -                | <i>lig4</i> <sup>6</sup>        | 9   |
| 31 <sup>E3</sup> | GCAGCCGAATTCGGTACATTACCCTGTTAT- <u>CCGCATAGGCC</u> ACTAGTGGATCTGGATCCT       | -                | <i>rad51 lig4</i> <sup>7</sup>  | 9   |
| 32 <sup>F1</sup> | GCAGCCGAATTCGGTACATTACCCTGTTAT- <u>GCGGCCGCATA</u> GGCCACTAGTGGATCTGGA       | III <sup>1</sup> | <i>rad51</i> <sup>3</sup>       | 5   |
| 33 <sup>F2</sup> | GCAGCCGAATTCGGTACATTACCCTGTTAT- <u>GCGGCCGCATA</u> GGCCACTAGTGGATCTGGA       | III <sup>2</sup> | <i>lig4</i> <sup>7</sup>        | 5   |
| 34 <sup>G1</sup> | GCGTCGTTTAGAGCAGCAGCCGAATTCGGT- <u>GGCCGCATA</u> GGCCACTAGTGGATCTGGATC       | I <sup>25</sup>  | <i>rad51</i> <sup>4</sup>       | 22  |
| 35 <sup>G2</sup> | GCGTCGTTTAGAGCAGCAGCCGAATTCGGT- <u>GGCCGCATAGGCC</u> ACTAGTGGATCTGGATC       | I <sup>26</sup>  | <i>polQ</i> <sup>4</sup>        | 22  |
| 36 <sup>H1</sup> | AGCAGCCGAATTCGGTACATTACCCTGTTA- <u>CCGCATAGGCC</u> ACTAGTGGATCTGGATCCT       | II <sup>5</sup>  | <i>rad51</i> <sup>5</sup>       | 10  |
| 37 <sup>H2</sup> | AGCAGCCGAATTCGGTACATTACCCTGTTA- <u>CCGCATAGGCC</u> ACTAGTGGATCTGGATCCT       | II <sup>6</sup>  | <i>rad51 ku70</i> <sup>4</sup>  | 10  |
| 38 <sup>I</sup>  | GCAGCCGAATTCGGTACATTACCCTGTTAT- <u>TAGCGGCCGCATAGGCC</u> ACTAGTGGATCTG       | -                | WT <sup>8</sup>                 | 3   |
| 39 <sup>I2</sup> | GCAGCCGAATTCGGTACATTACCCTGTTAT- <u>TAGCGGCCGCATAGGCC</u> ACTAGTGGATCTG       | -                | <i>ku70</i> <sup>4</sup>        | 3   |
| 40 <sup>J1</sup> | AGCAGCCGAATTCGGTACATTACCCTGTTA- <u>CGGCCGCATAGGCC</u> ACTAGTGGATCTGGAT       | II <sup>7</sup>  | WT <sup>9</sup>                 | 7   |
| 41 <sup>J2</sup> | AGCAGCCGAATTCGGTACATTACCCTGTTA- <u>CGGCCGCATAGGCC</u> ACTAGTGGATCTGGAT       | II <sup>8</sup>  | <i>rad51 lig4</i> <sup>8</sup>  | 7   |
| 42 <sup>K</sup>  | CAGCAGCCGAATTCGGTACATTACCCTGAT- <u>CCACTAGTGGAT</u> CTGGATCCTCTAGAGTCG       | -                | <i>ku70</i> <sup>5</sup>        | 20  |
| 43 <sup>L</sup>  | TCGTTTAGAGCAGCAGCCGAATTCGGTACA- <u>CTAGCGGCCGCATAGGCC</u> ACTAGTGGATCT       | -                | <i>ku70</i> <sup>6</sup>        | 14  |
| 44 <sup>M</sup>  | AGCAGCCGAATTCGGTACATTACCCTGTTA- <u>CATAGGCC</u> ACTAGTGGATCTGGATCCTCTA       | -                | WT <sup>10</sup>                | 13  |
| 45 <sup>N</sup>  | AGCAGCCGAATTCGGTACATTACCCTGTTA- <u>CCACTAGTGGAT</u> CTGGATCCTCTAGAGTCG       | II <sup>9</sup>  | <i>rad51 lig4</i> <sup>9</sup>  | 19  |
| 46 <sup>O</sup>  | ACCCTTACGTGGAATAAAAAAAAAAATGAAAT- <u>GCGCCGCATAGGCC</u> ACTAGTGGATCTGGATC    | -                | <i>polQ</i> <sup>5</sup>        | 459 |
| 47 <sup>P</sup>  | TGCGTCGTTTAGAGCAGCAGCCGAATTCGG- <u>CCCTAGCGGCC</u> GCATAGGCCACTAGTGGAT       | -                | WT <sup>11</sup>                | 16  |
| 48 <sup>Q</sup>  | AGCAGCCGAATTCGGTACATTACCCTGTTA- <u>CTAGCGGCCGCATAGGCC</u> ACTAGTGGATCT       | II <sup>10</sup> | WT <sup>12</sup>                | 3   |
| 49 <sup>S</sup>  | GCAGCCGAATTCGGTACATTACCCTGTTAT- <u>CGGCCGCATAGGCC</u> ACTAGTGGATCTGGAT       | -                | <i>rad51 lig4</i> <sup>10</sup> | 6   |
| 50 <sup>T</sup>  | GCAGCAGCCGAATTCGGTACATTACCCTGT- <u>ACTAGTGGAT</u> CTGGATCCTCTAGAGTCGAC       | -                | <i>rad51 ku70</i> <sup>5</sup>  | 23  |
| 51 <sup>U</sup>  | TAGAGCAGCAGCCGAATTCGGTACATTACCCTGTTA- <u>GCGGCCGCATAGGCC</u> ACTAGTGGATCTGGA | IV <sup>1</sup>  | <i>rad51</i> <sup>6</sup>       | 12  |
| 52 <sup>V</sup>  | GCAGCCGAATTCGGTACATTACCCTGTTAT- <u>GCGGCATA</u> GGCCACTAGTGGATCTGGATCC       | -                | <i>rad51</i> <sup>7</sup>       | 8   |
| 53 <sup>W</sup>  | GCAGCAGCCGAATTCGGTACATTACCCTGTT- <u>GCGGCCGCATA</u> GGCCACTAGTGGATCTGGA      | III <sup>3</sup> | <i>rad51</i> <sup>8</sup>       | 8   |
| 54 <sup>X</sup>  | CAGCAGCCGAATTCGGTACATTACCCTGTT- <u>GCGGCCGCATA</u> GGCCACTAGTGGATCTGGA       | III <sup>4</sup> | <i>polQ</i> <sup>6</sup>        | 7   |
| 55 <sup>Y</sup>  | GTTTAGAGCAGCAGCCGAATTCGGTACATT- <u>GCGGCCGCATA</u> GGCCACTAGTGGATCTGGA       | -                | WT <sup>13</sup>                | 15  |
| 56 <sup>Z</sup>  | AGCAGCAGCCGAATTCGGTACATTACCCTG- <u>CCTAGCGGCCGCATAGGCC</u> ACTAGTGGATC       | -                | <i>ku70</i> <sup>7</sup>        | 5   |
| 57 <sup>AA</sup> | GCAGCCGAATTCGGTACATTACCCTGTTAT- <u>GCATA</u> GGCCACTAGTGGATCTGGATCCTCT       | -                | WT <sup>14</sup>                | 11  |

|                  |                                                                                |     |                                 |    |
|------------------|--------------------------------------------------------------------------------|-----|---------------------------------|----|
| 58 <sup>AB</sup> | AGCAGCAGCCGAATTCGGTACATTACCCTG <b>GC</b> ATAG <b>GCCA</b> CTAGTGGATCTGGATCCTCT | -   | <i>lig4</i> <sup>8</sup>        | 15 |
| 59 <sup>AC</sup> | GCAGCCGAATTCGGTACATTACCCTGTTAT <b>CCACTAGTGGAT</b> CTGGATCCTCTAGAGTCG          | -   | <i>ku70</i> <sup>8</sup>        | 18 |
| 60               | GCAGCCGAATTCGGTACATTACCCTGTTAT <b>C</b> CTAGCGGCCGCATAGGCCACTAGTGGATC          | n/a | WT <sup>15</sup>                | 1  |
| 61               | GCAGCCGAATTCGGTACATTACCCTGTTAT <b>C</b> CTAGCGGCCGCATAGGCCACTAGTGGATC          | n/a | WT <sup>16</sup>                | 1  |
| 62               | GCAGCCGAATTCGGTACATTACCCTGTTAT <b>C</b> CTAGCGGCCGCATAGGCCACTAGTGGATC          | n/a | WT <sup>17</sup>                | 1  |
| 63               | GCAGCCGAATTCGGTACATTACCCTGTTAT <b>C</b> TAGCGGCCGCATAGGCCACTAGTGGATCT          | n/a | WT <sup>18</sup>                | 2  |
| 64               | AGCAGCAGCCGAATTCGGTACATTACCCTG <b>CC</b> TAGCGGCCGCATAGGCCACTAGTGGAT           | n/a | WT <sup>19</sup>                | 4  |
| 65               | AGCAGCAGCCGAATTCGGTACATTACCCTG <b>CC</b> TAGCGGCCGCATAGGCCACTAGTGGAT           | n/a | WT <sup>20</sup>                | 4  |
| 66               | AGCAGCAGCCGAATTCGGTACATTACCCTG <b>CC</b> TAGCGGCCGCATAGGCCACTAGTGGAT           | n/a | WT <sup>21</sup>                | 4  |
| 67               | GAGCAGCAGCCGAATTCGGTACATTACCCT <b>TTATCC</b> TAGCGGCCGCATAGGCCACTAGT           | n/a | <i>ku70</i> <sup>9</sup>        | 1  |
| 68               | GAGCAGCAGCCGAATTCGGTACATTACCCT <b>TTATCC</b> TAGCGGCCGCATAGGCCACTAGT           | n/a | <i>ku70</i> <sup>10</sup>       | 1  |
| 69               | AGCAGCAGCCGAATTCGGTACATTACCCTG <b>ATCC</b> TAGCGGCCGCATAGGCCACTAGTGG           | n/a | <i>ku70</i> <sup>11</sup>       | 2  |
| 70               | GCAGCCGAATTCGGTACATTACCCTGTTAT <b>C</b> TAGCGGCCGCATAGGCCACTAGTGGATCT          | n/a | <i>ku70</i> <sup>12</sup>       | 2  |
| 71               | AGCAGCAGCCGAATTCGGTACATTACCCTG <b>CC</b> TAGCGGCCGCATAGGCCACTAGTGGAT           | n/a | <i>ku70</i> <sup>13</sup>       | 4  |
| 72               | AGCAGCAGCCGAATTCGGTACATTACCCTG <b>C</b> TAGCGGCCGCATAGGCCACTAGTGGATCT          | n/a | <i>ku70</i> <sup>14</sup>       | 6  |
| 73               | CAGCAGCCGAATTCGGTACATTACCCTGTT <b>GCCGC</b> CATAGGCCACTAGTGGATCTGGATCC         | n/a | <i>ku70</i> <sup>15</sup>       | 10 |
| 74               | AGAGCAGCAGCCGAATTCGGTACATTACCC <b>GCCGC</b> CATAGGCCACTAGTGGATCTGGATCC         | n/a | <i>ku70</i> <sup>16</sup>       | 14 |
| 75               | GCAGCCGAATTCGGTACATTACCCTGTTAT <b>ATAG</b> GCCACTAGTGGATCTGGATCCTCTAG          | n/a | <i>lig4</i> <sup>9</sup>        | 13 |
| 76               | TGCGTCGTTTAGAGCAGCAGCCGAATTCGG <b>GGCCGC</b> CATAGGCCACTAGTGGATCTGGATC         | n/a | <i>lig4</i> <sup>10</sup>       | 23 |
| 77               | GAGCAGCAGCCGAATTCGGTACATTACCCT <b>TTATCC</b> TAGCGGCCGCATAGGCCACTAGT           | n/a | <i>rad51 ku70</i> <sup>6</sup>  | 1  |
| 78               | GAGCAGCAGCCGAATTCGGTACATTACCCT <b>TTATCC</b> TAGCGGCCGCATAGGCCACTAGT           | n/a | <i>rad51 ku70</i> <sup>7</sup>  | 1  |
| 79               | GAGCAGCAGCCGAATTCGGTACATTACCCT <b>TTATCC</b> TAGCGGCCGCATAGGCCACTAGT           | n/a | <i>rad51 ku70</i> <sup>8</sup>  | 1  |
| 80               | GCAGCCGAATTCGGTACATTACCCTGTTAT <b>C</b> CTAGCGGCCGCATAGGCCACTAGTGGATC          | n/a | <i>rad51 ku70</i> <sup>9</sup>  | 1  |
| 81               | GCAGCCGAATTCGGTACATTACCCTGTTAT <b>C</b> TAGCGGCCGCATAGGCCACTAGTGGATCT          | n/a | <i>rad51 ku70</i> <sup>10</sup> | 2  |
| 82               | CAGCAGCCGAATTCGGTACATTACCCTGTT <b>GCCGC</b> CATAGGCCACTAGTGGATCTGGATCC         | n/a | <i>rad51 lig4</i> <sup>11</sup> | 10 |
| 83               | GAGCAGCAGCCGAATTCGGTACATTACCCT <b>TTATCC</b> TAGCGGCCGCATAGGCCACTAGT           | n/a | <i>polQ</i> <sup>7</sup>        | 1  |
| 84               | GAGCAGCAGCCGAATTCGGTACATTACCCT <b>TTATCC</b> TAGCGGCCGCATAGGCCACTAGT           | n/a | <i>polQ</i> <sup>8</sup>        | 1  |
| 85               | GAGCAGCAGCCGAATTCGGTACATTACCCT <b>TTATCC</b> TAGCGGCCGCATAGGCCACTAGT           | n/a | <i>polQ</i> <sup>9</sup>        | 1  |
| 86               | GAGCAGCAGCCGAATTCGGTACATTACCCT <b>TTATCC</b> TAGCGGCCGCATAGGCCACTAGT           | n/a | <i>polQ</i> <sup>10</sup>       | 1  |
| 87               | CAGCAGCCGAATTCGGTACATTACCCTGTT <b>CCCTAG</b> CGGCCGCATAGGCCACTAGTGGGA          | n/a | <i>polQ</i> <sup>11</sup>       | 1  |

|     |                                                                                                                                |     |                           |    |
|-----|--------------------------------------------------------------------------------------------------------------------------------|-----|---------------------------|----|
| 88  | GCAGCCGAATTCGGTACATTACCCTGTTAT- <span style="border: 1px solid black; padding: 0 2px;">-</span> CCTAGCGGCCGCATAGGCCACTAGTGGATC | n/a | <i>polQ</i> <sup>12</sup> | 1  |
| 89  | GCAGCCGAATTCGGTACATTACCCTGTTAT- <span style="border: 1px solid black; padding: 0 2px;">-</span> CCTAGCGGCCGCATAGGCCACTAGTGGATC | n/a | <i>polQ</i> <sup>13</sup> | 1  |
| 90  | GCAGCCGAATTCGGTACATTACCCTGTTAT- <span style="border: 1px solid black; padding: 0 2px;">-</span> CCTAGCGGCCGCATAGGCCACTAGTGGATC | n/a | <i>polQ</i> <sup>14</sup> | 1  |
| 91  | GCAGCCGAATTCGGTACATTACCCTGTTAT- <span style="border: 1px solid black; padding: 0 2px;">-</span> CTAGCGGCCGCATAGGCCACTAGTGGATCT | n/a | <i>polQ</i> <sup>15</sup> | 2  |
| 92  | GCAGCCGAATTCGGTACATTACCCTGTTAT- <span style="border: 1px solid black; padding: 0 2px;">-</span> CTAGCGGCCGCATAGGCCACTAGTGGATCT | n/a | <i>polQ</i> <sup>16</sup> | 2  |
| 93  | GCAGCCGAATTCGGTACATTACCCTGTTAT- <span style="border: 1px solid black; padding: 0 2px;">-</span> CTAGCGGCCGCATAGGCCACTAGTGGATCT | n/a | <i>polQ</i> <sup>17</sup> | 2  |
| 94  | TAGAGCAGCAGCCGAATTCGGTACATTACC- <span style="border: 1px solid black; padding: 0 2px;">-</span> TTATCCCTAGCGGCCGCATAGGCCACTAGT | n/a | <i>polQ</i> <sup>18</sup> | 3  |
| 95  | TAGAGCAGCAGCCGAATTCGGTACATTACC- <span style="border: 1px solid black; padding: 0 2px;">-</span> TTATCCCTAGCGGCCGCATAGGCCACTAGT | n/a | <i>polQ</i> <sup>19</sup> | 3  |
| 96  | AGCAGCAGCCGAATTCGGTACATTACCCTG- <span style="border: 1px solid black; padding: 0 2px;">-</span> CCCTAGCGGCCGCATAGGCCACTAGTGGAT | n/a | <i>polQ</i> <sup>20</sup> | 4  |
| 97  | AGCAGCAGCCGAATTCGGTACATTACCCTG- <span style="border: 1px solid black; padding: 0 2px;">-</span> CCCTAGCGGCCGCATAGGCCACTAGTGGAT | n/a | <i>polQ</i> <sup>21</sup> | 4  |
| 98  | AGCAGCAGCCGAATTCGGTACATTACCCTG- <span style="border: 1px solid black; padding: 0 2px;">-</span> CCCTAGCGGCCGCATAGGCCACTAGTGGAT | n/a | <i>polQ</i> <sup>22</sup> | 4  |
| 99  | AGCAGCAGCCGAATTCGGTACATTACCCTG- <span style="border: 1px solid black; padding: 0 2px;">-</span> CCCTAGCGGCCGCATAGGCCACTAGTGGAT | n/a | <i>polQ</i> <sup>23</sup> | 4  |
| 100 | TTAGAGCAGCAGCCGAATTCGGTACATTAC- <span style="border: 1px solid black; padding: 0 2px;">-</span> GCGGCCGCATAGGCCACTAGTGGATCTGGA | n/a | <i>polQ</i> <sup>24</sup> | 13 |
| 101 | TGGAGTACGAAATGCGTCGTTTAGAGCAGC- <span style="border: 1px solid black; padding: 0 2px;">-</span> TTATCCCTAGCGGCCGCATAGGCCACTAGT | n/a | <i>polQ</i> <sup>25</sup> | 24 |

**Table S3. Sequences of apparent blunt joins.** Sequences and genotypes of all repair products with apparent blunt joins (n=101). Deleted bases not shown. Boxed dashes indicate apparent point of ligation (box notation indicates a possible insertion of length zero in SD-MMEJ consistent sequences) . Identical SD-MMEJ consistent sequences are indicated by a lettered superscript on the sequence number; letters cross-reference Table 1. SD-MMEJ consistent repeats are underlined. Predicted SD-MMEJ primer repeats in italics. Primer repeat groups as in Table 1 are indicated by Roman numerals and enumerated in superscripts. 59/101 (58.4%) of sequences are SD-MMEJ consistent (direct or inverted repeat of at least 4 bp within  $\pm 20$  bp of the junction). This proportion is significantly greater than would be predicted by random chance ( $p < 0.05$  Fisher's Exact Test). Expected proportion of SD-MMEJ consistent blunt joins was estimated by Monte Carlo simulation of random deletion events (See Materials and Methods). Number of sequences of a given genotype enumerated in superscripts. 30 bp on either side of the junction are shown. n/a: not applicable.

**Table S4.**

|                   | sequence of repair products with junctional microhomology<br>□.nnn□ indicates microhomology |                  | genotype                | del (bp) |
|-------------------|---------------------------------------------------------------------------------------------|------------------|-------------------------|----------|
| 1 <sup>A1</sup>   | GAGCAGCAGCCGAATTCGGTACATTACCCT□.G□.GCCGCATA <u>GGCCA</u> CTAGTGGATCTGGATCC                  | I <sup>1</sup>   | WT <sup>1</sup>         | 12       |
| 2 <sup>A2</sup>   | GAGCAGCAGCCGAATTCGGTACATTACCCT□.G□.GCCGCATA <u>GGCCA</u> CTAGTGGATCTGGATCC                  | I <sup>2</sup>   | WT <sup>2</sup>         | 12       |
| 3 <sup>A3</sup>   | GAGCAGCAGCCGAATTCGGTACATTACCCT□.G□.GCCGCATA <u>GGCCA</u> CTAGTGGATCTGGATCC                  | I <sup>3</sup>   | WT <sup>3</sup>         | 12       |
| 4 <sup>A4</sup>   | GAGCAGCAGCCGAATTCGGTACATTACCCT□.G□.GCCGCATA <u>GGCCA</u> CTAGTGGATCTGGATCC                  | I <sup>4</sup>   | rad51 <sup>1</sup>      | 12       |
| 5 <sup>A5</sup>   | GAGCAGCAGCCGAATTCGGTACATTACCCT□.G□.GCCGCATA <u>GGCCA</u> CTAGTGGATCTGGATCC                  | I <sup>5</sup>   | rad51 <sup>2</sup>      | 12       |
| 6 <sup>A6</sup>   | GAGCAGCAGCCGAATTCGGTACATTACCCT□.G□.GCCGCATA <u>GGCCA</u> CTAGTGGATCTGGATCC                  | I <sup>6</sup>   | rad51 <sup>3</sup>      | 12       |
| 7 <sup>A7</sup>   | GAGCAGCAGCCGAATTCGGTACATTACCCT□.G□.GCCGCATA <u>GGCCA</u> CTAGTGGATCTGGATCC                  | I <sup>7</sup>   | lig4 <sup>1</sup>       | 12       |
| 8 <sup>A8</sup>   | GAGCAGCAGCCGAATTCGGTACATTACCCT□.G□.GCCGCATA <u>GGCCA</u> CTAGTGGATCTGGATCC                  | I <sup>8</sup>   | lig4 <sup>2</sup>       | 12       |
| 9 <sup>A9</sup>   | GAGCAGCAGCCGAATTCGGTACATTACCCT□.G□.GCCGCATA <u>GGCCA</u> CTAGTGGATCTGGATCC                  | I <sup>9</sup>   | lig4 <sup>3</sup>       | 12       |
| 10 <sup>A10</sup> | GAGCAGCAGCCGAATTCGGTACATTACCCT□.G□.GCCGCATA <u>GGCCA</u> CTAGTGGATCTGGATCC                  | I <sup>10</sup>  | lig4 <sup>4</sup>       | 12       |
| 11 <sup>A11</sup> | GAGCAGCAGCCGAATTCGGTACATTACCCT□.G□.GCCGCATA <u>GGCCA</u> CTAGTGGATCTGGATCC                  | I <sup>11</sup>  | lig4 <sup>5</sup>       | 12       |
| 12 <sup>A12</sup> | GAGCAGCAGCCGAATTCGGTACATTACCCT□.G□.GCCGCATA <u>GGCCA</u> CTAGTGGATCTGGATCC                  | I <sup>12</sup>  | lig4 <sup>6</sup>       | 12       |
| 13 <sup>A13</sup> | GAGCAGCAGCCGAATTCGGTACATTACCCT□.G□.GCCGCATA <u>GGCCA</u> CTAGTGGATCTGGATCC                  | I <sup>13</sup>  | lig4 <sup>7</sup>       | 12       |
| 14 <sup>A14</sup> | GAGCAGCAGCCGAATTCGGTACATTACCCT□.G□.GCCGCATA <u>GGCCA</u> CTAGTGGATCTGGATCC                  | I <sup>14</sup>  | rad51 ku70 <sup>1</sup> | 12       |
| 15 <sup>A15</sup> | GAGCAGCAGCCGAATTCGGTACATTACCCT□.G□.GCCGCATA <u>GGCCA</u> CTAGTGGATCTGGATCC                  | I <sup>15</sup>  | rad51 lig4 <sup>1</sup> | 12       |
| 16 <sup>A16</sup> | GAGCAGCAGCCGAATTCGGTACATTACCCT□.G□.GCCGCATA <u>GGCCA</u> CTAGTGGATCTGGATCC                  | I <sup>16</sup>  | rad51 lig4 <sup>2</sup> | 12       |
| 17 <sup>A17</sup> | GAGCAGCAGCCGAATTCGGTACATTACCCT□.G□.GCCGCATA <u>GGCCA</u> CTAGTGGATCTGGATCC                  | I <sup>17</sup>  | rad51 lig4 <sup>3</sup> | 12       |
| 18 <sup>A18</sup> | GAGCAGCAGCCGAATTCGGTACATTACCCT□.G□.GCCGCATA <u>GGCCA</u> CTAGTGGATCTGGATCC                  | I <sup>18</sup>  | rad51 lig4 <sup>4</sup> | 12       |
| 19 <sup>A19</sup> | GAGCAGCAGCCGAATTCGGTACATTACCCT□.G□.GCCGCATA <u>GGCCA</u> CTAGTGGATCTGGATCC                  | I <sup>19</sup>  | rad51 lig4 <sup>5</sup> | 12       |
| 20 <sup>B1</sup>  | TTTAGAGCAGCAGCCGAATTC <u>GGTA</u> CAT <u>TA</u> □.CCCT□.AGCGGCCGCATAGGCCACTAGTGGATCTGG      | IV <sup>1</sup>  | WT <sup>4</sup>         | 9        |
| 21 <sup>B2</sup>  | TTTAGAGCAGCAGCCGAATTC <u>GGTA</u> CAT <u>TA</u> □.CCCT□.AGCGGCCGCATAGGCCACTAGTGGATCTGG      | IV <sup>2</sup>  | rad51 <sup>4</sup>      | 9        |
| 22 <sup>B3</sup>  | TTTAGAGCAGCAGCCGAATTC <u>GGTA</u> CAT <u>TA</u> □.CCCT□.AGCGGCCGCATAGGCCACTAGTGGATCTGG      | IV <sup>3</sup>  | ku70 <sup>1</sup>       | 9        |
| 23 <sup>B4</sup>  | TTTAGAGCAGCAGCCGAATTC <u>GGTA</u> CAT <u>TA</u> □.CCCT□.AGCGGCCGCATAGGCCACTAGTGGATCTGG      | IV <sup>4</sup>  | ku70 <sup>2</sup>       | 9        |
| 24 <sup>B5</sup>  | TTTAGAGCAGCAGCCGAATTC <u>GGTA</u> CAT <u>TA</u> □.CCCT□.AGCGGCCGCATAGGCCACTAGTGGATCTGG      | IV <sup>5</sup>  | ku70 <sup>3</sup>       | 9        |
| 25 <sup>B6</sup>  | TTTAGAGCAGCAGCCGAATTC <u>GGTA</u> CAT <u>TA</u> □.CCCT□.AGCGGCCGCATAGGCCACTAGTGGATCTGG      | IV <sup>6</sup>  | lig4 <sup>8</sup>       | 9        |
| 26 <sup>B7</sup>  | TTTAGAGCAGCAGCCGAATTC <u>GGTA</u> CAT <u>TA</u> □.CCCT□.AGCGGCCGCATAGGCCACTAGTGGATCTGG      | IV <sup>7</sup>  | lig4 <sup>9</sup>       | 9        |
| 27 <sup>B8</sup>  | TTTAGAGCAGCAGCCGAATTC <u>GGTA</u> CAT <u>TA</u> □.CCCT□.AGCGGCCGCATAGGCCACTAGTGGATCTGG      | IV <sup>8</sup>  | lig4 <sup>10</sup>      | 9        |
| 28 <sup>B9</sup>  | TTTAGAGCAGCAGCCGAATTC <u>GGTA</u> CAT <u>TA</u> □.CCCT□.AGCGGCCGCATAGGCCACTAGTGGATCTGG      | IV <sup>9</sup>  | rad51 ku70 <sup>2</sup> | 9        |
| 29 <sup>B10</sup> | TTTAGAGCAGCAGCCGAATTC <u>GGTA</u> CAT <u>TA</u> □.CCCT□.AGCGGCCGCATAGGCCACTAGTGGATCTGG      | IV <sup>10</sup> | rad51 ku70 <sup>3</sup> | 9        |
| 30 <sup>B11</sup> | TTTAGAGCAGCAGCCGAATTC <u>GGTA</u> CAT <u>TA</u> □.CCCT□.AGCGGCCGCATAGGCCACTAGTGGATCTGG      | IV <sup>11</sup> | rad51 lig4 <sup>6</sup> | 9        |
| 31 <sup>B12</sup> | TTTAGAGCAGCAGCCGAATTC <u>GGTA</u> CAT <u>TA</u> □.CCCT□.AGCGGCCGCATAGGCCACTAGTGGATCTGG      | IV <sup>12</sup> | rad51 lig4 <sup>7</sup> | 9        |

|                   |                                                                                              |                  |                                 |    |
|-------------------|----------------------------------------------------------------------------------------------|------------------|---------------------------------|----|
| 32 <sup>B13</sup> | TTAGAGCAGCAGCCGAATTC <u>GGTA</u> CAT <u>TA</u> . <u>CCCT</u> .AGCGGCCGCATAGGCCACTAGTGGATCTGG | IV <sup>13</sup> | <i>polQ</i> <sup>1</sup>        | 9  |
| 33 <sup>B14</sup> | TTAGAGCAGCAGCCGAATTC <u>GGTA</u> CAT <u>TA</u> . <u>CCCT</u> .AGCGGCCGCATAGGCCACTAGTGGATCTGG | IV <sup>14</sup> | <i>polQ</i> <sup>2</sup>        | 9  |
| 34 <sup>B15</sup> | TTAGAGCAGCAGCCGAATTC <u>GGTA</u> CAT <u>TA</u> . <u>CCCT</u> .AGCGGCCGCATAGGCCACTAGTGGATCTGG | IV <sup>15</sup> | <i>polQ</i> <sup>3</sup>        | 9  |
| 35 <sup>D1</sup>  | TTAGAGCAGCAGCCGAATTC <u>GGTA</u> CAT <u>TAC</u> . <u>CC</u> .GCATAGGCCACTAGTGGATCTGGATCCTCT  | IV <sup>16</sup> | WT <sup>5</sup>                 | 17 |
| 36 <sup>D2</sup>  | TTAGAGCAGCAGCCGAATTC <u>GGTA</u> CAT <u>TAC</u> . <u>CC</u> .GCATAGGCCACTAGTGGATCTGGATCCTCT  | IV <sup>17</sup> | WT <sup>6</sup>                 | 17 |
| 37 <sup>D3</sup>  | TTAGAGCAGCAGCCGAATTC <u>GGTA</u> CAT <u>TAC</u> . <u>CC</u> .GCATAGGCCACTAGTGGATCTGGATCCTCT  | IV <sup>18</sup> | WT <sup>7</sup>                 | 17 |
| 38 <sup>D4</sup>  | TTAGAGCAGCAGCCGAATTC <u>GGTA</u> CAT <u>TAC</u> . <u>CC</u> .GCATAGGCCACTAGTGGATCTGGATCCTCT  | IV <sup>19</sup> | <i>lig4</i> <sup>11</sup>       | 17 |
| 39 <sup>D5</sup>  | TTAGAGCAGCAGCCGAATTC <u>GGTA</u> CAT <u>TAC</u> . <u>CC</u> .GCATAGGCCACTAGTGGATCTGGATCCTCT  | IV <sup>20</sup> | <i>lig4</i> <sup>12</sup>       | 17 |
| 40 <sup>D6</sup>  | TTAGAGCAGCAGCCGAATTC <u>GGTA</u> CAT <u>TAC</u> . <u>CC</u> .GCATAGGCCACTAGTGGATCTGGATCCTCT  | IV <sup>21</sup> | <i>rad51 lig4</i> <sup>8</sup>  | 17 |
| 41 <sup>D7</sup>  | TTAGAGCAGCAGCCGAATTC <u>GGTA</u> CAT <u>TAC</u> . <u>CC</u> .GCATAGGCCACTAGTGGATCTGGATCCTCT  | IV <sup>22</sup> | <i>rad51 lig4</i> <sup>9</sup>  | 17 |
| 42 <sup>D8</sup>  | TTAGAGCAGCAGCCGAATTC <u>GGTA</u> CAT <u>TAC</u> . <u>CC</u> .GCATAGGCCACTAGTGGATCTGGATCCTCT  | IV <sup>23</sup> | <i>rad51 lig4</i> <sup>10</sup> | 17 |
| 43 <sup>D9</sup>  | TTAGAGCAGCAGCCGAATTC <u>GGTA</u> CAT <u>TAC</u> . <u>CC</u> .GCATAGGCCACTAGTGGATCTGGATCCTCT  | IV <sup>24</sup> | <i>polQ</i> <sup>4</sup>        | 17 |
| 44 <sup>D10</sup> | TTAGAGCAGCAGCCGAATTC <u>GGTA</u> CAT <u>TAC</u> . <u>CC</u> .GCATAGGCCACTAGTGGATCTGGATCCTCT  | IV <sup>25</sup> | <i>polQ</i> <sup>5</sup>        | 17 |
| 45 <sup>E1</sup>  | GAGCAGCAGCCGAATTCGGTACATTACCCT. <u>G</u> . <u>CGGCCGCA</u> TAGGCCACTAGTGGATCTGGAT            | III <sup>1</sup> | WT <sup>8</sup>                 | 10 |
| 46 <sup>E2</sup>  | GAGCAGCAGCCGAATTCGGTACATTACCCT. <u>G</u> . <u>CGGCCGCA</u> TAGGCCACTAGTGGATCTGGAT            | III <sup>2</sup> | <i>rad51</i> <sup>5</sup>       | 10 |
| 47 <sup>E3</sup>  | GAGCAGCAGCCGAATTCGGTACATTACCCT. <u>G</u> . <u>CGGCCGCA</u> TAGGCCACTAGTGGATCTGGAT            | III <sup>3</sup> | <i>rad51</i> <sup>6</sup>       | 10 |
| 48 <sup>E4</sup>  | GAGCAGCAGCCGAATTCGGTACATTACCCT. <u>G</u> . <u>CGGCCGCA</u> TAGGCCACTAGTGGATCTGGAT            | III <sup>4</sup> | <i>ku70</i> <sup>4</sup>        | 10 |
| 49 <sup>E5</sup>  | GAGCAGCAGCCGAATTCGGTACATTACCCT. <u>G</u> . <u>CGGCCGCA</u> TAGGCCACTAGTGGATCTGGAT            | III <sup>5</sup> | <i>lig4</i> <sup>13</sup>       | 10 |
| 50 <sup>E6</sup>  | GAGCAGCAGCCGAATTCGGTACATTACCCT. <u>G</u> . <u>CGGCCGCA</u> TAGGCCACTAGTGGATCTGGAT            | III <sup>6</sup> | <i>rad51 ku70</i> <sup>4</sup>  | 10 |
| 51 <sup>E7</sup>  | GAGCAGCAGCCGAATTCGGTACATTACCCT. <u>G</u> . <u>CGGCCGCA</u> TAGGCCACTAGTGGATCTGGAT            | III <sup>7</sup> | <i>rad51 ku70</i> <sup>5</sup>  | 10 |
| 52 <sup>E8</sup>  | GAGCAGCAGCCGAATTCGGTACATTACCCT. <u>G</u> . <u>CGGCCGCA</u> TAGGCCACTAGTGGATCTGGAT            | III <sup>8</sup> | <i>polQ</i> <sup>6</sup>        | 10 |
| 53 <sup>E9</sup>  | GAGCAGCAGCCGAATTCGGTACATTACCCT. <u>G</u> . <u>CGGCCGCA</u> TAGGCCACTAGTGGATCTGGAT            | III <sup>9</sup> | <i>polQ</i> <sup>7</sup>        | 10 |
| 54 <sup>Z1</sup>  | TAGAGCAGCAG <u>GCCG</u> AATTCGGTACATTACC. <u>C</u> . <u>GGCCGC</u> CATAGGCCACTAGTGGATCTGGATC | -                | <i>rad51</i> <sup>7</sup>       | 13 |
| 55 <sup>Z2</sup>  | TAGAGCAGCAG <u>GCCG</u> AATTCGGTACATTACC. <u>C</u> . <u>GGCCGC</u> CATAGGCCACTAGTGGATCTGGATC | -                | <i>rad51</i> <sup>8</sup>       | 13 |
| 56 <sup>Z3</sup>  | TAGAGCAGCAG <u>GCCG</u> AATTCGGTACATTACC. <u>C</u> . <u>GGCCGC</u> CATAGGCCACTAGTGGATCTGGATC | -                | <i>ku70</i> <sup>5</sup>        | 13 |
| 57 <sup>Z4</sup>  | TAGAGCAGCAG <u>GCCG</u> AATTCGGTACATTACC. <u>C</u> . <u>GGCCGC</u> CATAGGCCACTAGTGGATCTGGATC | -                | <i>ku70</i> <sup>6</sup>        | 13 |
| 58 <sup>Z5</sup>  | TAGAGCAGCAG <u>GCCG</u> AATTCGGTACATTACC. <u>C</u> . <u>GGCCGC</u> CATAGGCCACTAGTGGATCTGGATC | -                | <i>ku70</i> <sup>7</sup>        | 13 |
| 59 <sup>Z6</sup>  | TAGAGCAGCAG <u>GCCG</u> AATTCGGTACATTACC. <u>C</u> . <u>GGCCGC</u> CATAGGCCACTAGTGGATCTGGATC | -                | <i>rad51 lig4</i> <sup>11</sup> | 13 |
| 60 <sup>Z7</sup>  | TAGAGCAGCAG <u>GCCG</u> AATTCGGTACATTACC. <u>C</u> . <u>GGCCGC</u> CATAGGCCACTAGTGGATCTGGATC | -                | <i>polQ</i> <sup>8</sup>        | 13 |
| 61 <sup>F1</sup>  | TTAGAGCAGCAGCCGAATT <u>CGGTA</u> CAT <u>TA</u> . <u>CC</u> .GCATAGGCCACTAGTGGATCTGGATCCTCT   | IV <sup>26</sup> | WT <sup>9</sup>                 | 18 |
| 62 <sup>F2</sup>  | TTAGAGCAGCAGCCGAATT <u>CGGTA</u> CAT <u>TA</u> . <u>CC</u> .GCATAGGCCACTAGTGGATCTGGATCCTCT   | IV <sup>27</sup> | WT <sup>10</sup>                | 18 |
| 63 <sup>F3</sup>  | TTAGAGCAGCAGCCGAATT <u>CGGTA</u> CAT <u>TA</u> . <u>CC</u> .GCATAGGCCACTAGTGGATCTGGATCCTCT   | IV <sup>28</sup> | <i>rad51</i> <sup>9</sup>       | 18 |
| 64 <sup>F4</sup>  | TTAGAGCAGCAGCCGAATT <u>CGGTA</u> CAT <u>TA</u> . <u>CC</u> .GCATAGGCCACTAGTGGATCTGGATCCTCT   | IV <sup>29</sup> | <i>rad51</i> <sup>10</sup>      | 18 |
| 65 <sup>F5</sup>  | TTAGAGCAGCAGCCGAATT <u>CGGTA</u> CAT <u>TA</u> . <u>CC</u> .GCATAGGCCACTAGTGGATCTGGATCCTCT   | IV <sup>30</sup> | <i>ku70</i> <sup>8</sup>        | 18 |



|                  |                                                                                                     |                  |                          |     |
|------------------|-----------------------------------------------------------------------------------------------------|------------------|--------------------------|-----|
| 66 <sup>F6</sup> | TTTAGAGCAGCAGCCGAATT <b>CGGTA</b> CAT <b>TAC</b> . <b>CC</b> .GCATAGGCCACTAGTGGATCTGGATCCTCT        | IV <sup>31</sup> | polQ <sup>9</sup>        | 18  |
| 67 <sup>G1</sup> | AGAGCAGCAGCCGAATTCGGTACATT <b>CCC</b> . <b>T</b> .TAT <b>CCCT</b> AGCGGCCGCATAGGCCACTAGTG           | -                | WT <sup>11</sup>         | 2   |
| 68 <sup>G2</sup> | AGAGCAGCAGCCGAATTCGGTACATT <b>CCC</b> . <b>T</b> .TAT <b>CCCT</b> AGCGGCCGCATAGGCCACTAGTG           | -                | ku70 <sup>9</sup>        | 2   |
| 69 <sup>G3</sup> | AGAGCAGCAGCCGAATTCGGTACATT <b>CCC</b> . <b>T</b> .TAT <b>CCCT</b> AGCGGCCGCATAGGCCACTAGTG           | -                | polQ <sup>10</sup>       | 2   |
| 70 <sup>G4</sup> | AGAGCAGCAGCCGAATTCGGTACATT <b>CCC</b> . <b>T</b> .TAT <b>CCCT</b> AGCGGCCGCATAGGCCACTAGTG           | -                | polQ <sup>11</sup>       | 2   |
| 71 <sup>H1</sup> | AGCAGCAGCCGAATTCGGT <b>TACA</b> T <b>TACCC</b> <b>TG</b> . <b>T</b> .ATCCCTAGCGGCCGCATAGGCCACTAGTGG | -                | rad51 ku70 <sup>6</sup>  | 1   |
| 72 <sup>H2</sup> | AGCAGCAGCCGAATTCGGT <b>TACA</b> T <b>TACCC</b> <b>TG</b> . <b>T</b> .ATCCCTAGCGGCCGCATAGGCCACTAGTGG | -                | rad51 ku70 <sup>7</sup>  | 1   |
| 73 <sup>H3</sup> | AGCAGCAGCCGAATTCGGT <b>TACA</b> T <b>TACCC</b> <b>TG</b> . <b>T</b> .ATCCCTAGCGGCCGCATAGGCCACTAGTGG | -                | rad51 ku70 <sup>8</sup>  | 1   |
| 74 <sup>I1</sup> | AGCAGCCGAATTCGGTACATTACCCTGTT <b>A</b> . <b>T</b> . <b>AG</b> CGGCCGC <b>ATAG</b> GCCACTAGTGGATCTGG | -                | ku70 <sup>10</sup>       | 4   |
| 75 <sup>I2</sup> | AGCAGCCGAATTCGGTACATTACCCTGTT <b>A</b> . <b>T</b> . <b>AG</b> CGGCCGC <b>ATAG</b> GCCACTAGTGGATCTGG | -                | rad51 ku70 <sup>9</sup>  | 4   |
| 76 <sup>I3</sup> | AGCAGCCGAATTCGGTACATTACCCTGTT <b>A</b> . <b>T</b> . <b>AG</b> CGGCCGC <b>ATAG</b> GCCACTAGTGGATCTGG | -                | rad51 ku70 <sup>10</sup> | 4   |
| 77 <sup>J1</sup> | AAATGCGTCGTTTAGAGCAGCAG <b>GCCGAATT</b> . <b>CGG</b> .CCGCATAGGCCACTAGTGGATCTGGATCCT                | -                | WT <sup>12</sup>         | 25  |
| 78 <sup>J2</sup> | AAATGCGTCGTTTAGAGCAGCAG <b>GCCGAATT</b> . <b>CGG</b> .CCGCATAGGCCACTAGTGGATCTGGATCCT                | -                | lig4 <sup>14</sup>       | 25  |
| 79 <sup>J3</sup> | AAATGCGTCGTTTAGAGCAGCAG <b>GCCGAATT</b> . <b>CGG</b> .CCGCATAGGCCACTAGTGGATCTGGATCCT                | -                | rad51 ku70 <sup>11</sup> | 25  |
| 80 <sup>L1</sup> | TTAGAGCAGCAGCCGAATT <b>CGGTA</b> CAT <b>TAC</b> . <b>C</b> .GGCCGCATAGGCCACTAGTGGATCTGGATC          | IV <sup>32</sup> | ku70 <sup>11</sup>       | 14  |
| 81 <sup>L2</sup> | TTAGAGCAGCAGCCGAATT <b>CGGTA</b> CAT <b>TAC</b> . <b>C</b> .GGCCGCATAGGCCACTAGTGGATCTGGATC          | IV <sup>33</sup> | rad51 ku70 <sup>12</sup> | 14  |
| 82 <sup>M1</sup> | AGCAGCAGCCGAATTCGGT <b>TACA</b> T <b>TACCC</b> <b>TG</b> . <b>T</b> .AGCGGCCGCATAGGCCACTAGTGGATCTGG | -                | WT <sup>13</sup>         | 7   |
| 83 <sup>M2</sup> | AGCAGCAGCCGAATTCGGT <b>TACA</b> T <b>TACCC</b> <b>TG</b> . <b>T</b> .AGCGGCCGCATAGGCCACTAGTGGATCTGG | -                | polQ <sup>12</sup>       | 7   |
| 84 <sup>N1</sup> | AGAGCAGCAGCCGAATTCGGTACATTACC <b>.TG</b> . <b>GATCTGGATC</b> CTCTAGAGTCGACCTCGAAC                   | -                | WT <sup>14</sup>         | 31  |
| 85 <sup>O1</sup> | CGTCGTTTAGAGCAGCAGCCGAATTCGGT <b>A</b> . <b>C</b> . <b>TAG</b> CGGCCGCATAGGCC <b>ACTAG</b> TGGATCTG | -                | rad51 ku70 <sup>13</sup> | 16  |
| 86 <sup>P1</sup> | ATGCGTCGTTTAGAGCAGCAG <b>CCGAATTCG</b> . <b>G</b> .GCCGCATAGGCCACTAGTGGATCTGGATCC                   | -                | ku70 <sup>12</sup>       | 24  |
| 87 <sup>R1</sup> | TTAGAGCAGCAGCCGAATTC <b>GGTA</b> CAT <b>TAC</b> . <b>C</b> .ATAGGCCACTAGTGGATCTGGATCCTCTAG          | IV <sup>34</sup> | rad51 <sup>11</sup>      | 20  |
| 88 <sup>S1</sup> | GAGTACGAAATGCGTCGTTTAGAGCAGCAG <b>.CC</b> . <b>CTAGCGCCGCA</b> <b>TAGG</b> CCACTAGTGGATCTG          | -                | ku70 <sup>13</sup>       | 26  |
| 89 <sup>T1</sup> | TTAGAGCAGCAGCCGAATTCGGTACATT <b>AC</b> . <b>CC</b> . <b>ACTAGTGGAT</b> CTGGATCCTCTAGAGTCGAC         | -                | WT <sup>15</sup>         | 26  |
| 90 <sup>U1</sup> | GGAGTACGAAATGCGTCGTTTAGAG <b>CAGCC</b> . <b>AGC</b> .GGCCGCATAGGCCACTAGTGGATCTGGATC                 | -                | WT <sup>16</sup>         | 35  |
| 91 <sup>V1</sup> | TTAGAGCAGCAGCCGAATTCGGTACATT <b>AC</b> . <b>CCT</b> .CTAGAGTCGA <b>CCTC</b> GAAACGTTAACGTTAAC       | -                | rad51 <sup>12</sup>      | 44  |
| 92 <sup>W1</sup> | GCGTCGTTTAGAGCAGCAGCCGAATTCGGT <b>.C</b> . <b>ACTAGTG</b> GATCTGGATCCTCTAGAGTCGAC                   | -                | WT <sup>17</sup>         | 60  |
| 93 <sup>X1</sup> | ATTCGCAGTGG <b>AAGG</b> CTGCACCTGCAA <b>AAG</b> . <b>G</b> .GGCCGCATAGGCCACTAGTGGATCTGGATC          | -                | polQ <sup>13</sup>       | 288 |
| 94 <sup>Y1</sup> | GAAAATTGTGGGA <b>GCAG</b> AGCCTTGGGT <b>GCA</b> . <b>GCC</b> .GCATAGGCCACTAGTGGATCTGGATCCTCT        | -                | ku70 <sup>14</sup>       | 259 |
| 95               | GAGCAGCAGCCGAATTCGGTACATTACCCT <b>.G</b> .CCGCATAGGCCACTAGTGGATCTGGATCCT                            | n/a              | WT <sup>18</sup>         | 13  |
| 96               | GAGCAGCAGCCGAATTCGGTACATTACCCT <b>.G</b> .CATAGGCCACTAGTGGATCTGGATCCTCTA                            | n/a              | WT <sup>19</sup>         | 16  |
| 97               | CGTTTAGAGCAGCAGCCGAATTCGGTACAT <b>.TA</b> .GGCCACTAGTGGATCTGGATCCTCTAGAGT                           | n/a              | WT <sup>20</sup>         | 25  |
| 98               | CAGCAGCCGAATTCGGTACATTACCCTGTT <b>.AT</b> .CTGGATCCTCTAGAGTCGACCTCGAACGTT                           | n/a              | WT <sup>21</sup>         | 30  |
| 99               | GTCGTTTAGAGCAGCAGCCGAATTCGGTAC <b>.AT</b> .CCCTAGCGGCCGCATAGGCCACTAGTGGAT                           | n/a              | WT <sup>22</sup>         | 11  |

|     |                                                                     |     |                          |     |
|-----|---------------------------------------------------------------------|-----|--------------------------|-----|
| 100 | GCAGCAGCCGAATTCGGTACATTACCCTGT.TA.GCGGCCGCATAGGCCACTAGTGGATCTGGA    | n/a | WT <sup>23</sup>         | 6   |
| 101 | GCAGCAGCCGAATTCGGTACATTACCCTGT.TA.GCGGCCGCATAGGCCACTAGTGGATCTGGA    | n/a | WT <sup>24</sup>         | 6   |
| 102 | GCAGCAGCCGAATTCGGTACATTACCCTGT.TA.GCGGCCGCATAGGCCACTAGTGGATCTGGA    | n/a | rad51 <sup>13</sup>      | 6   |
| 103 | GGAGTACGAAATGCGTCGTTTAGAGCAGCA.GCCG.CATAGGCCACTAGTGGATCTGGATCCTCTA  | n/a | rad51 <sup>14</sup>      | 35  |
| 104 | AGAGCAGCAGCCGAATTCGGTACATTACCCT.TG.CTTCGAGAGAGCGCGCTCGAATGTTTCGCG   | n/a | rad51 <sup>15</sup>      | 216 |
| 105 | AGCAGCAGCCGAATTCGGTACATTACCCTG.T.T.CCCTAGCGGCCGCATAGGCCACTAGTGGAT   | n/a | ku70 <sup>15</sup>       | 3   |
| 106 | GCAGCAGCCGAATTCGGTACATTACCCTGT.TA.GCGGCCGCATAGGCCACTAGTGGATCTGGA    | n/a | ku70 <sup>16</sup>       | 6   |
| 107 | GCAGCAGCCGAATTCGGTACATTACCCTGT.TA.GCGGCCGCATAGGCCACTAGTGGATCTGGA    | n/a | ku70 <sup>17</sup>       | 6   |
| 108 | GCAGCAGCCGAATTCGGTACATTACCCTGT.TA.GCGGCCGCATAGGCCACTAGTGGATCTGGA    | n/a | ku70 <sup>18</sup>       | 6   |
| 109 | TCGTTTAGAGCAGCAGCCGAATTCGGTACA.TTA.TCCCTAGCGGCCGCATAGGCCACTAGTGGGA  | n/a | ku70 <sup>19</sup>       | 8   |
| 110 | TCGTTTAGAGCAGCAGCCGAATTCGGTACA.TTA.TCCCTAGCGGCCGCATAGGCCACTAGTGGGA  | n/a | ku70 <sup>20</sup>       | 8   |
| 111 | TCGTTTAGAGCAGCAGCCGAATTCGGTACA.TTA.TCCCTAGCGGCCGCATAGGCCACTAGTGGGA  | n/a | ku70 <sup>21</sup>       | 8   |
| 112 | GAGCAGCAGCCGAATTCGGTACATTACCCT.G.CCGCATAGGCCACTAGTGGATCTGGATCCT     | n/a | ku70 <sup>22</sup>       | 13  |
| 113 | CGTTTAGAGCAGCAGCCGAATTCGGTACAT.TA.GCGGCCGCATAGGCCACTAGTGGATCTGGA    | n/a | ku70 <sup>23</sup>       | 14  |
| 114 | GCAGCAGCCGAATTCGGTACATTACCCTGT.TA.GTGGATCTGGATCCTCTAGAGTCGACCTCG    | n/a | ku70 <sup>24</sup>       | 25  |
| 115 | TCGTTTAGAGCAGCAGCCGAATTCGGTACA.TTA.TCCCTAGCGGCCGCATAGGCCACTAGTGGGA  | n/a | lig4 <sup>15</sup>       | 8   |
| 116 | GCAGCAGCCGAATTCGGTACATTACCCTGT.TA.GCGGCCGCATAGGCCACTAGTGGATCTGGA    | n/a | lig4 <sup>16</sup>       | 6   |
| 117 | GAGCAGCAGCCGAATTCGGTACATTACCCT.G.CCGCATAGGCCACTAGTGGATCTGGATCCT     | n/a | lig4 <sup>17</sup>       | 13  |
| 118 | GAGCAGCAGCCGAATTCGGTACATTACCCT.G.CCGCATAGGCCACTAGTGGATCTGGATCCT     | n/a | lig4 <sup>18</sup>       | 13  |
| 119 | CGTTTAGAGCAGCAGCCGAATTCGGTACAT.TA.GCGGCCGCATAGGCCACTAGTGGATCTGGA    | n/a | lig4 <sup>19</sup>       | 14  |
| 120 | TAGAGCAGCAGCCGAATTCGGTACATTACC.C.CGCATAGGCCACTAGTGGATCTGGATCCTC     | n/a | lig4 <sup>20</sup>       | 16  |
| 121 | CGTCGTTTAGAGCAGCAGCCGAATTCGGTA.CAT.AGGCCACTAGTGGATCTGGATCCTCTAGAG   | n/a | lig4 <sup>21</sup>       | 26  |
| 122 | GCAGCAGCCGAATTCGGTACATTACCCTGT.TA.GCGGCCGCATAGGCCACTAGTGGATCTGGA    | n/a | rad51 ku70 <sup>14</sup> | 6   |
| 123 | TCGTTTAGAGCAGCAGCCGAATTCGGTACA.TTA.TCCCTAGCGGCCGCATAGGCCACTAGTGGGA  | n/a | rad51 lig4 <sup>12</sup> | 8   |
| 124 | CAGCAGCCGAATTCGGTACATTACCCTGTT.AT.AGGCCACTAGTGGATCTGGATCCTCTAGAG    | n/a | rad51 lig4 <sup>13</sup> | 15  |
| 125 | AAAAATTCGTACTTTGGAGTACGAAATGCG.TCGTT.GCTTCGAGAGAGCGCGCTCGAATGTTTCGC | n/a | rad51 lig4 <sup>14</sup> | 250 |
| 126 | GCAGCCGAATTCGGTACATTACCCTGTAT.TAT.CCCTAGCGGCCGCATAGGCCACTAGTGGAT    | n/a | polQ <sup>*14</sup>      | 0   |
| 127 | GCAGCCGAATTCGGTACATTACCCTGTAT.TAT.CCCTAGCGGCCGCATAGGCCACTAGTGGAT    | n/a | polQ <sup>*15</sup>      | 0   |
| 128 | GCAGCAGCCGAATTCGGTACATTACCCTGT.TA.GCGGCCGCATAGGCCACTAGTGGATCTGGA    | n/a | polQ <sup>16</sup>       | 6   |
| 129 | GCAGCAGCCGAATTCGGTACATTACCCTGT.TA.GCGGCCGCATAGGCCACTAGTGGATCTGGA    | n/a | polQ <sup>17</sup>       | 6   |
| 130 | TCGTTTAGAGCAGCAGCCGAATTCGGTACA.TTA.TCCCTAGCGGCCGCATAGGCCACTAGTGGGA  | n/a | polQ <sup>18</sup>       | 8   |
| 131 | CAGCAGCCGAATTCGGTACATTACCCTGTT.AT.AGGCCACTAGTGGATCTGGATCCTCTAGAG    | n/a | polQ <sup>19</sup>       | 15  |
| 132 | ACGAAATGCGTCGTTTAGAGCAGCAGCCGA.AT.CCCTAGCGGCCGCATAGGCCACTAGTGGAT    | n/a | polQ <sup>20</sup>       | 20  |
| 133 | CGTCGTTTAGAGCAGCAGCCGAATTCGGTA.CAT.AGGCCACTAGTGGATCTGGATCCTCTAGAG   | n/a | polQ <sup>21</sup>       | 26  |

|     |                                                                                                                                                                                               |     |                           |     |
|-----|-----------------------------------------------------------------------------------------------------------------------------------------------------------------------------------------------|-----|---------------------------|-----|
| 134 | GGTCAGACATTTAAAAGGAGGCGACTCAAC <span style="border: 1px solid black; padding: 0 2px;">G</span> <span style="border: 1px solid black; padding: 0 2px;">G</span> GGCCGCATAGGCCACTAGTGGATCTGGATC | n/a | <i>polQ</i> <sup>22</sup> | 259 |
|-----|-----------------------------------------------------------------------------------------------------------------------------------------------------------------------------------------------|-----|---------------------------|-----|

**Table S4: Sequences of repair junctions with microhomology.** SD-MMEJ consistent repair products with junctional microhomologies. 94/134 (70.1%) of microhomology junctions are SD-MMEJ consistent. This is significantly greater than predicted by random chance ( $p=0.05$ , Fisher's Exact Test). Junctional microhomologies (bases that cannot be unambiguously assigned to either side of the repair junction) are situated between boxes with dots to represent the uncertainty with regard to the position at which the strands were ligated during repair. The box notation is used to emphasize the possibility of a "zero insertion" SD-MMEJ event. The two sequences containing apparent net insertions (asterisks above genotype) are consistent with mispairing of the 3' DSB ends and are thus classified as junctional microhomologies. Other conventions are as described for Supplemental Table S2.

**Table S5.**

|                   | sequence                                                                                               |                  | genotype                | deln | inst |
|-------------------|--------------------------------------------------------------------------------------------------------|------------------|-------------------------|------|------|
| 1 <sup>A1</sup>   | AGCAGCCGAATTCGGTACA <b>TTACCC</b> TG <b>TTA</b> <b>c</b> CCGCATAGGCCACTAGTGGATCTGGATCCT                | II <sup>1</sup>  | WT <sup>1</sup>         | 10   | 1    |
| 2 <sup>A2</sup>   | AGCAGCCGAATTCGGTACA <b>TTACCC</b> TG <b>TTA</b> <b>c</b> CCGCATAGGCCACTAGTGGATCTGGATCCT                | II <sup>2</sup>  | rad51 <sup>1</sup>      | 10   | 1    |
| 3 <sup>A3</sup>   | AGCAGCCGAATTCGGTACA <b>TTACCC</b> TG <b>TTA</b> <b>c</b> CCGCATAGGCCACTAGTGGATCTGGATCCT                | II <sup>3</sup>  | rad51 <sup>2</sup>      | 10   | 1    |
| 4 <sup>A4</sup>   | AGCAGCCGAATTCGGTACA <b>TTACCC</b> TG <b>TTA</b> <b>c</b> CCGCATAGGCCACTAGTGGATCTGGATCCT                | II <sup>4</sup>  | rad51 <sup>3</sup>      | 10   | 1    |
| 5 <sup>A5</sup>   | AGCAGCCGAATTCGGTACA <b>TTACCC</b> TG <b>TTA</b> <b>c</b> CCGCATAGGCCACTAGTGGATCTGGATCCT                | II <sup>5</sup>  | lig4 <sup>1</sup>       | 10   | 1    |
| 6 <sup>A6</sup>   | AGCAGCCGAATTCGGTACA <b>TTACCC</b> TG <b>TTA</b> <b>c</b> CCGCATAGGCCACTAGTGGATCTGGATCCT                | II <sup>6</sup>  | lig4 <sup>2</sup>       | 10   | 1    |
| 7 <sup>A7</sup>   | AGCAGCCGAATTCGGTACA <b>TTACCC</b> TG <b>TTA</b> <b>c</b> CCGCATAGGCCACTAGTGGATCTGGATCCT                | II <sup>7</sup>  | lig4 rad51 <sup>1</sup> | 10   | 1    |
| 8 <sup>A8</sup>   | AGCAGCCGAATTCGGTACA <b>TTACCC</b> TG <b>TTA</b> <b>c</b> CCGCATAGGCCACTAGTGGATCTGGATCCT                | II <sup>8</sup>  | lig4 rad51 <sup>2</sup> | 10   | 1    |
| 9 <sup>A9</sup>   | AGCAGCCGAATTCGGTACA <b>TTACCC</b> TG <b>TTA</b> <b>c</b> CCGCATAGGCCACTAGTGGATCTGGATCCT                | II <sup>9</sup>  | lig4 rad51 <sup>3</sup> | 10   | 1    |
| 10 <sup>A10</sup> | AGCAGCCGAATTCGGTACA <b>TTACCC</b> TG <b>TTA</b> <b>c</b> CCGCATAGGCCACTAGTGGATCTGGATCCT                | II <sup>10</sup> | lig4 rad51 <sup>4</sup> | 10   | 1    |
| 11 <sup>B1</sup>  | GCAGCCGAATTCGGTACATTACCCTGTT <b>AT</b> <b>a</b> <b>GGCC</b> <b>GC</b> <b>ATAGGCC</b> ACTAGTGGATCTGGATC | I <sup>1</sup>   | lig4 <sup>3</sup>       | 7    | 1    |
| 12 <sup>B2</sup>  | GCAGCCGAATTCGGTACATTACCCTGTT <b>AT</b> <b>a</b> <b>GGCC</b> <b>GC</b> <b>ATAGGCC</b> ACTAGTGGATCTGGATC | I <sup>2</sup>   | lig4 rad51 <sup>5</sup> | 7    | 1    |
| 13 <sup>C1</sup>  | GCAGCCGAATTCGG <b>TACAT</b> TACCCTGTT <b>AT</b> <b>a</b> <b>TAG</b> CGGCCGCATAGGCCACTAGTGGATCTG        | -                | rad51 <sup>4</sup>      | 3    | 1    |
| 14 <sup>C2</sup>  | GCAGCCGAATTCGG <b>TACAT</b> TACCCTGTT <b>AT</b> <b>a</b> <b>TAG</b> CGGCCGCATAGGCCACTAGTGGATCTG        | -                | lig4 <sup>4</sup>       | 3    | 1    |
| 15 <sup>D</sup>   | GCAGCAGCCGAATT <b>CGGTACA</b> TTACCCT <b>TGT</b> <b>a</b> <b>CCG</b> CATAGGCCACTAGTGGATCTGGATCCT       | -                | ku70 <sup>1</sup>       | 12   | 1    |
| 16 <sup>E</sup>   | GCAGCAGCCGAATT <b>GGTACA</b> TTACCCT <b>TGT</b> <b>a</b> <b>CC</b> ACTAGTGGATCTGGATCCTCTAGAGTCG        | -                | WT <sup>2</sup>         | 21   | 1    |
| 17 <sup>F</sup>   | AGCAGCCGAATTCGGTACA <b>TTACCC</b> TG <b>TTA</b> <b>c</b> CGGCCGCATAGGCCACTAGTGGATCTGGAT                | II <sup>11</sup> | rad51 ku70 <sup>1</sup> | 7    | 1    |
| 18 <sup>G</sup>   | AGCAGCCGAATTCGGTACATTACCCTGTT <b>a</b> <b>CTAG</b> GCC <b>ACTAG</b> TGGATCTGGATCCTCTAGA                | -                | rad51 lig4 <sup>6</sup> | 15   | 1    |
| 19 <sup>H</sup>   | TTAGAGCAGCAGCCGAATTCGGTACATT <b>a</b> <b>CTAG</b> CGGCCGC <b>CATAG</b> GCCACTAGTGGATCTG                | -                | polQ <sup>1</sup>       | 11   | 1    |
| 20 <sup>I</sup>   | GCAGCAGCCGAATTCGGTACATTACCCT <b>TGT</b> <b>a</b> <b>GCC</b> GCGCATAG <b>GCCAC</b> TAGTGGATCTGGA        | -                | rad51 <sup>5</sup>      | 8    | 1    |
| 21 <sup>J</sup>   | AGCAGCAGCCGAATTCGGTACATTACCCT <b>TGT</b> <b>a</b> <b>CC</b> TAGCGGCCGCATA <b>GGCCA</b> ACTAGTGGAT      | -                | WT <sup>3</sup>         | 4    | 1    |
| 22 <sup>K</sup>   | GCAGCCGAATTCGGTACATTACCCTGTT <b>AT</b> <b>a</b> <b>GCC</b> GC <b>CATAG</b> GCCACTAGTGGATCTGGATCC       | -                | lig4 <sup>5</sup>       | 8    | 1    |
| 23 <sup>M</sup>   | AGCAGCAGCCGAATTCGGTACATTACCCT <b>c</b> <b>CGCCCG</b> CATAGGCCACTAGTGGATCTGGAT                          | -                | rad51 lig4 <sup>7</sup> | 10   | 1    |
| 24                | AGCAGCCGAATTCGGTACATTACCCTGTT <b>a</b> <b>CGGCC</b> GCATAGGCCACTAGTGGATCTGGAT                          | n/a              | ku70 <sup>2</sup>       | 7    | 1    |
| 25                | CAGCAGCCGAATTCGGTACATTACCCTGTT <b>c</b> <b>CGGCC</b> GCATAGGCCACTAGTGGATCTGGAT                         | n/a              | lig4 <sup>6</sup>       | 8    | 1    |
| 26                | AGCAGCAGCCGAATTCGGTACATTACCCTG <b>a</b> <b>TTATCC</b> CTAGCGGCCGCATAGGCCACTAGT                         | n/a              | rad51 ku70 <sup>2</sup> | 0    | 1    |
| 27                | AGCAGCAGCCGAATTCGGTACATTACCCTG <b>a</b> <b>GGCC</b> GCATAGGCCACTAGTGGATCTGGATC                         | n/a              | rad51ku70 <sup>3</sup>  | 11   | 1    |
| 28                | TAGAGCAGCAGCCGAATTCGGTACATTACC <b>c</b> <b>GGCC</b> GCATAGGCCACTAGTGGATCTGGATC                         | n/a              | rad51 lig4 <sup>8</sup> | 14   | 1    |

**Table S5. Sequences of repair junctions with 1 bp insertions.** Sequences and genotypes of all repair products with net insertions of one bp. Inserted sequence is boxed and in lowercase. Notational conventions as for Table S2.

**Table S6.**

|                  | sequence                                                                                                                        |                  | genotype                | deln | inst |
|------------------|---------------------------------------------------------------------------------------------------------------------------------|------------------|-------------------------|------|------|
| 1 <sup>A1</sup>  | GAGCAGCAGCCGAATTCGGTACATTACCCTatGGCGCCGCATAGGCCACTAGTGGATCTGGA                                                                  | III <sup>1</sup> | rad51 <sup>1</sup>      | 10   | 2    |
| 2 <sup>A2</sup>  | GAGCAGCAGCCGAATTCGGTACATTACCCTatGGCGCCGCATAGGCCACTAGTGGATCTGGA                                                                  | III <sup>2</sup> | ku70 <sup>1</sup>       | 10   | 2    |
| 3 <sup>A3</sup>  | GAGCAGCAGCCGAATTCGGTACATTACCCTatGGCGCCGCATAGGCCACTAGTGGATCTGGA                                                                  | III <sup>3</sup> | lig4 <sup>1</sup>       | 10   | 2    |
| 4 <sup>A4</sup>  | GAGCAGCAGCCGAATTCGGTACATTACCCTatGGCGCCGCATAGGCCACTAGTGGATCTGGA                                                                  | III <sup>4</sup> | rad51 ku70 <sup>1</sup> | 10   | 2    |
| 5 <sup>B1</sup>  | AGCAGCCGAATTCGGTACATTACCCTGTatGGCCGCATAGGCCACTAGTGGATCTGGATC                                                                    | I <sup>1</sup>   | WT <sup>1</sup>         | 8    | 2    |
| 6 <sup>B2</sup>  | AGCAGCCGAATTCGGTACATTACCCTGTatGGCCGCATAGGCCACTAGTGGATCTGGATC                                                                    | I <sup>2</sup>   | ku70 <sup>2</sup>       | 8    | 2    |
| 7 <sup>B3</sup>  | AGCAGCCGAATTCGGTACATTACCCTGTatGGCCGCATAGGCCACTAGTGGATCTGGATC                                                                    | I <sup>3</sup>   | rad51 lig4 <sup>1</sup> | 8    | 2    |
| 8 <sup>C1</sup>  | AGCAGCCGAATTCGGTACA TTACCC TGTatGGCGCCGCATAGGCCACTAGTGGATCTGGAT                                                                 | II <sup>1</sup>  | rad51 <sup>2</sup>      | 7    | 2    |
| 9 <sup>C2</sup>  | AGCAGCCGAATTCGGTACA TTACCC TGTatGGCGCCGCATAGGCCACTAGTGGATCTGGAT                                                                 | II <sup>2</sup>  | rad51 ku70 <sup>2</sup> | 7    | 2    |
| 10 <sup>C3</sup> | AGCAGCCGAATTCGGTACA TTACCC TGTatGGCGCCGCATAGGCCACTAGTGGATCTGGAT                                                                 | II <sup>3</sup>  | polQ <sup>1</sup>       | 7    | 2    |
| 11 <sup>D1</sup> | AGCAGCCGAATTCGGTACATTA CCCT GTTatGGCCGCATAGGCCACTAGTGGATCTGGATC<br>AGCAGCCGAATTCGGTACATTACCCTGTatGGCCGCATAGGCCACTAGTGGATCTGGATC | I <sup>4</sup>   | WT <sup>2</sup>         | 8    | 2    |
| 12 <sup>D2</sup> | AGCAGCCGAATTCGGTACATTA CCCT GTTatGGCCGCATAGGCCACTAGTGGATCTGGATC<br>AGCAGCCGAATTCGGTACATTACCCTGTatGGCCGCATAGGCCACTAGTGGATCTGGATC | I <sup>5</sup>   | WT <sup>3</sup>         | 8    | 2    |
| 13 <sup>E1</sup> | GCAGCCGAATTCGGTACATTACCCTGTTatGGCCGCATAGGCCACTAGTGGATCTGGATC<br>GCAGCCGAATTCGGTACATTACCCTGTTatGGCCGCATAGGCCACTAGTGGATCTGGATC    | I <sup>6</sup>   | WT <sup>4</sup>         | 7    | 2    |
| 14 <sup>E2</sup> | GCAGCCGAATTCGGTACATTACCCTGTTatGGCCGCATAGGCCACTAGTGGATCTGGATC<br>GCAGCCGAATTCGGTACATTACCCTGTTatGGCCGCATAGGCCACTAGTGGATCTGGATC    | I <sup>7</sup>   | lig4 <sup>2</sup>       | 7    | 2    |
| 15 <sup>F</sup>  | TTTAGAGCAGCAGCCGAATTCGGTACATTatGGCCGCATAGGCCACTAGTGGATCTGGATC                                                                   | I <sup>7</sup>   | lig4 <sup>3</sup>       | 16   | 2    |
| 16 <sup>G</sup>  | GCAGCAGCCGAATTCGGTACATTACCCTGTatGGCGCCGCATAGGCCACTAGTGGATCTGGA                                                                  | III <sup>5</sup> | rad51 ku70 <sup>3</sup> | 8    | 2    |
| 17 <sup>H</sup>  | GCAGCCGAATTCGGTACATTACCCTGTTatGGCGCCGCATAGGCCACTAGTGGATCTGGA                                                                    | III <sup>6</sup> | WT <sup>5</sup>         | 5    | 2    |
| 18 <sup>I</sup>  | GAGCAGCAGCCGAATTCGGTACATTACCCTatGCATAGGCCACTAGTGGATCTGGATCCTCT                                                                  | -                | rad51 <sup>3</sup>      | 16   | 2    |
| 19 <sup>J</sup>  | GCAGCCGAATTCGGTACATTACCCTGTTatTAGGCCACTAGTGGATCTGGATCCTCTAGA                                                                    | -                | lig4 <sup>4</sup>       | 14   | 2    |
| 20 <sup>K</sup>  | GCAGCCGAATTCGGTACATTACCCTGTTatGGCCGCATAGGCCACTAGTGGATCTGGATC<br>GCAGCCGAATTCGGTACATTACCCTGTTatGGCCGCATAGGCCACTAGTGGATCTGGATC    | I <sup>8</sup>   | rad51 lig4 <sup>2</sup> | 7    | 2    |
| 21               | GCAGCCGAATTCGGTACATTACCCTGTTatGCCGCATAGGCCACTAGTGGATCTGGATCC                                                                    | n/a              | rad51 <sup>4</sup>      | 8    | 2    |
| 22               | TAGAGCAGCAGCCGAATTCGGTACATTACCCTTATCCCTAGCGGCCGCATAGGCCACTAGT                                                                   | n/a              | rad51 ku70 <sup>4</sup> | 1    | 2    |
| 23               | AGAGCAGCAGCCGAATTCGGTACATTACCCTGGCCGCATAGGCCACTAGTGGATCTGGATC                                                                   | n/a              | rad51 ku70 <sup>5</sup> | 13   | 2    |
| 24               | AGCAGCCGAATTCGGTACATTACCCTGTTacGCCGCATAGGCCACTAGTGGATCTGGATCC                                                                   | n/a              | rad51 lig4 <sup>3</sup> | 9    | 2    |
| 25               | CAGCAGCCGAATTCGGTACATTACCCTGTTgtGCCGCATAGGCCACTAGTGGATCTGGATCC                                                                  | n/a              | rad51 lig4 <sup>4</sup> | 10   | 2    |
| 26               | CGTTTAGAGCAGCAGCCGAATTCGGTACATccGGCCGCATAGGCCACTAGTGGATCTGGAT                                                                   | n/a              | polQ <sup>2</sup>       | 17   | 2    |

**Table S6. Sequences of repair junctions with 2 bp insertions.** Sequences and genotypes of all repair products with net insertions of 2 bp. Inserted sequence is boxed and in lowercase. For repair products with multiple SD-MMEJ consistent repeats, all repeats are indicated. Notational conventions as for Table S2.

**Table S7.**

|                 | sequence                                                                                                                                             |                  | genotype                | deln | inst |
|-----------------|------------------------------------------------------------------------------------------------------------------------------------------------------|------------------|-------------------------|------|------|
| 1 <sup>A1</sup> | TAGAGCAGCAGCCGAATTCGGTACATTACCt <b>aat</b> GGCGCCGCATAGGCCACTAGTGGATCTGGA                                                                            | III <sup>1</sup> | WT <sup>1</sup>         | 12   | 3    |
| 2 <sup>A2</sup> | TAGAGCAGCAGCCGAATTCGGTACATTACCt <b>aat</b> GGCGCCGCATAGGCCACTAGTGGATCTGGA                                                                            | III <sup>2</sup> | rad51 ku70 <sup>1</sup> | 12   | 3    |
| 3 <sup>A3</sup> | TAGAGCAGCAGCCGAATTCGGTACATTACCt <b>aat</b> GGCGCCGCATAGGCCACTAGTGGATCTGGA                                                                            | III <sup>3</sup> | rad51 ku70 <sup>2</sup> | 12   | 3    |
| 4 <sup>B1</sup> | GCAGCAGCCGAATTCGGTACATTACCCTGT <b>aat</b> GGCCGCATAGGCCACTAGTGGATCTGGATC<br>GCAGCAGCCGAATTCGGTACATTACCCTGT <b>aat</b> GGCCGCATAGGCCACTAGTGGATCTGGATC | I <sup>1</sup>   | ku70 <sup>1</sup>       | 10   | 3    |
| 5 <sup>B2</sup> | GCAGCAGCCGAATTCGGTACATTACCCTGT <b>aat</b> GGCCGCATAGGCCACTAGTGGATCTGGATC<br>GCAGCAGCCGAATTCGGTACATTACCCTGT <b>aat</b> GGCCGCATAGGCCACTAGTGGATCTGGATC | I <sup>2</sup>   | rad51 ku70 <sup>3</sup> | 10   | 3    |
| 6 <sup>C</sup>  | AGAGCAGCAGCCGAATTCGGTACATTACC <b>ata</b> GGCCGCATAGGCCACTAGTGGATCTGGATC                                                                              | I <sup>3</sup>   | ku70 <sup>2</sup>       | 13   | 3    |
| 7 <sup>D</sup>  | GCAGCAGCCGAATTCGGTACATTACCCTGT <b>aat</b> GGCCGCATAGGCCACTAGTGGATCTGGATC                                                                             | I <sup>4</sup>   | lig4 <sup>1</sup>       | 10   | 3    |
| 8 <sup>E</sup>  | GCAGCCGAATTCGGTACATTACCCTGT <b>aat</b> GGCCGCATAGGCCACTAGTGGATCTGGATC                                                                                | I <sup>5</sup>   | rad51 lig4 <sup>1</sup> | 7    | 3    |
| 9 <sup>F</sup>  | AGCAGCCGAATTCGGTACATTACCCTGT <b>aca</b> GGCCGCATAGGCCACTAGTGGATCTGGATC<br>AGCAGCCGAATTCGGTACATTACCCTGT <b>aca</b> GGCCGCATAGGCCACTAGTGGATCTGGATC     | I <sup>6</sup>   | lig4 <sup>2</sup>       | 8    | 3    |
| 10 <sup>G</sup> | TTTAGAGCAGCAGCCGAATTCGGTACATTACC <b>aac</b> GGCCGCATAGGCCACTAGTGGATCTGGATCCT                                                                         | -                | polQ <sup>1</sup>       | 18   | 3    |
| 11 <sup>H</sup> | GCAGCAGCCGAATTCGGTACATTACCCTGT <b>aat</b> GGCCGCATAGGCCACTAGTGGATCTGGATC                                                                             | -                | ku70 <sup>3</sup>       | 11   | 3    |
| 12 <sup>I</sup> | GCAGCAGCCGAATTCGGTACATTACCCTGT <b>aat</b> GGCGCCGCATAGGCCACTAGTGGATCTGGA<br>GCAGCAGCCGAATTCGGTACATTACCCTGT <b>aat</b> GGCGCCGCATAGGCCACTAGTGGATCTGGA | III <sup>4</sup> | lig4 <sup>3</sup>       | 8    | 3    |
| 13 <sup>J</sup> | GCAGCCGAATTCGGTACATTACCCTGT <b>att</b> GGCCGCATAGGCCACTAGTGGATCTGGATC<br>GCAGCCGAATTCGGTACATTACCCTGT <b>att</b> GGCCGCATAGGCCACTAGTGGATCTGGATC       | I <sup>7</sup>   | rad51 ku70 <sup>4</sup> | 7    | 3    |
| 14              | GCAGCCGAATTCGGTACATTACCCTGT <b>ggt</b> GGCCGCATAGGCCACTAGTGGATCTGGATC                                                                                | n/a              | rad51 <sup>1</sup>      | 7    | 3    |
| 15              | AGCTTGAGGGAAAAAATTCGTACTTTGGAG <b>gat</b> ATCTGGATCCTCTAGAGTCGACCTCGAACG                                                                             | n/a              | rad51 <sup>2</sup>      | 81   | 3    |
| 16              | CAGCAGCCGAATTCGGTACATTACCCTGT <b>ggt</b> GGCCGCATAGGCCACTAGTGGATCTGGATC                                                                              | n/a              | polQ <sup>2</sup>       | 9    | 3    |

**Supplemental Table S7.** Sequences and genotypes of all repair products with net insertions of 3 bp. Inserted sequence is boxed and in lowercase. For repair products with multiple SD-MMEJ consistent repeats, all repeats are indicated. Notational conventions as for Table S2.

**Table S8.**

|    | sequence of junctions with ≥4 bp insertions                                                     | genotype | del | ins |
|----|-------------------------------------------------------------------------------------------------|----------|-----|-----|
| 1  | AGCAGCCGAATTCGGTACATTACCCCTGTTA <b>catta</b> TCCTAGCGGCCGCATAGGCCACTAGTGGA                      | WT       | 0   | 5   |
| 2  | GCAGCCGAATTCGGTACATTACCCCTGTTA <b>ttacattacattaccccta</b> CCCTAGCGGCCGCATAGGCCACTAGTGGA         | WT       | 0   | 19  |
| 3  | GCAGCCGAATTCGGTACATTACCCCTGTTA <b>gggtaatggtat</b> GCGGCCGCATAGGCCACTAGTGGA                     | WT       | 5   | 12  |
| 4  | GCAGCAGCCGAATTCGGTACATTACCCCTGTTA <b>taataa</b> TAGCGGCCGCATAGGCCACTAGTGGA                      | WT       | 6   | 5   |
| 5  | GCAGCCGAATTCGGTACATTACCCCTGTTA <b>aggg</b> CGGCCGCATAGGCCACTAGTGGA                              | WT       | 6   | 5   |
| 6  | GCAGCCGAATTCGGTACATTACCCCTGTTA <b>gctatgt</b> GGCCGCATAGGCCACTAGTGGA                            | WT       | 7   | 7   |
| 7  | GCAGCCGAATTCGGTACATTACCCCTGTTA <b>tcacgtgccgaagtgt</b> GGCCGCATAGGCCACTAGTGGA                   | WT       | 7   | 16  |
| 8  | GCAGCAGCCGAATTCGGTACATTACCCCTGTTA <b>aattataattataattattatagt</b> GGCCGCATAGGCCACTAGTGGA        | WT       | 7   | 24  |
| 9  | GCAGCAGCCGAATTCGGTACATTACCCCTGTTA <b>aacaggttatgcgataaccactat</b> GGCCGCATAGGCCACTAGTGGA        | WT       | 7   | 26  |
| 10 | AGCAGCAGCCGAATTCGGTACATTACCCCTGTTA <b>cggtta</b> AGCGGCCGCATAGGCCACTAGTGGA                      | WT       | 8   | 5   |
| 11 | AGCAGCCGAATTCGGTACATTACCCCTGTTA <b>acagggta</b> GGCCGCATAGGCCACTAGTGGA                          | WT       | 8   | 8   |
| 12 | AGCAGCAGCCGAATTCGGTACATTACCCCTGTTA <b>ctatgt</b> GGCCGCATAGGCCACTAGTGGA                         | WT       | 11  | 6   |
| 13 | AGAGCAGCAGCCGAATTCGGTACATTACCCCTGTTA <b>ggttc</b> CGGCCGCATAGGCCACTAGTGGA                       | WT       | 12  | 5   |
| 14 | GCAGCAGCCGAATTCGGTACATTACCCCTGTTA <b>ggcctttt</b> GCATAGGCCACTAGTGGA                            | WT       | 13  | 8   |
| 15 | GCAGCAGCCGAATTCGGTACATTACCCCTGTTA <b>aatgtaatgtaacgtatagccat</b> ATAGGCCACTAGTGGA               | WT       | 16  | 24  |
| 16 | TAGAGCAGCAGCCGAATTCGGTACATTACCCCTGTTA <b>gaatagggtaatgtg</b> GCATAGGCCACTAGTGGA                 | WT       | 18  | 15  |
| 17 | AGCAGCAGCCGAATTCGGTACATTACCCCTGTTA <b>cattaccctacattaccattc</b> TTATCCCTAGCGGCCGCATAGGCCACTAGT  | rad51    | 0   | 21  |
| 18 | GCAGCCGAATTCGGTACATTACCCCTGTTA <b>ttat</b> CCCTAGCGGCCGCATAGGCCACTAGTGGA                        | rad51    | 0   | 4   |
| 19 | AGCAGCCGAATTCGGTACATTACCCCTGTTA <b>ccctgt</b> TAGCGGCCGCATAGGCCACTAGTGGA                        | rad51    | 4   | 6   |
| 20 | GCAGCCGAATTCGGTACATTACCCCTGTTA <b>ccctgggtatgtagggatagggatgtatccctgt</b> GCCGCATAGGCCACTAGTGGA  | rad51    | 8   | 38  |
| 21 | GCAGCCGAATTCGGTACATTACCCCTGTTA <b>gttagt</b> GGCCGCATAGGCCACTAGTGGA                             | rad51    | 7   | 6   |
| 22 | GCAGCCGAATTCGGTACATTACCCCTGTTA <b>atatatagt</b> GGCCGCATAGGCCACTAGTGGA                          | rad51    | 7   | 9   |
| 23 | GCAGCCGAATTCGGTACATTACCCCTGTTA <b>gtacattagt</b> GGCCGCATAGGCCACTAGTGGA                         | rad51    | 7   | 10  |
| 24 | GCAGCCGAATTCGGTACATTACCCCTGTTA <b>acaggtattaccct</b> GGCCGCATAGGCCACTAGTGGA                     | rad51    | 7   | 14  |
| 25 | AGCAGCCGAATTCGGTACATTACCCCTGTTA <b>ccctgt</b> GGCCGCATAGGCCACTAGTGGA                            | rad51    | 8   | 6   |
| 26 | AGCAGCCGAATTCGGTACATTACCCCTGTTA <b>ccctgt</b> GGCCGCATAGGCCACTAGTGGA                            | rad51    | 8   | 6   |
| 27 | CAGCAGCCGAATTCGGTACATTACCCCTGTTA <b>gtgtagt</b> GGCCGCATAGGCCACTAGTGGA                          | rad51    | 9   | 7   |
| 28 | GCAGCCGAATTCGGTACATTACCCCTGTTA <b>aggccgatatac</b> CCGCATAGGCCACTAGTGGA                         | rad51    | 9   | 13  |
| 29 | TTAGAGCAGCAGCCGAATTCGGTACATTACCCCTGTTA <b>ataggcataggtaatgtag</b> CTAGCGGCCGCATAGGCCACTAGTGGA   | rad51    | 10  | 20  |
| 30 | AGAGCAGCAGCCGAATTCGGTACATTACCCCTGTTA <b>gaattacattaccggccggc</b> AGCGGCCGCATAGGCCACTAGTGGA      | rad51    | 10  | 20  |
| 31 | GCAGCAGCCGAATTCGGTACATTACCCCTGTTA <b>accct</b> GGCCGCATAGGCCACTAGTGGA                           | rad51    | 10  | 5   |
| 32 | GCAGCAGCCGAATTCGGTACATTACCCCTGTTA <b>attaccgggtacagt</b> GGCCGCATAGGCCACTAGTGGA                 | rad51    | 10  | 15  |
| 33 | AGCAGCCGAATTCGGTACATTACCCCTGTTA <b>ctagatcgtggatcgtgttac</b> CCGCATAGGCCACTAGTGGA               | rad51    | 10  | 22  |
| 34 | GCAGCCGAATTCGGTACATTACCCCTGTTA <b>aggg</b> ATAGGCCACTAGTGGA                                     | rad51    | 13  | 5   |
| 35 | GCAGCCGAATTCGGTACATTACCCCTGTTA <b>taggt</b> ATAGGCCACTAGTGGA                                    | rad51    | 13  | 6   |
| 36 | GCAGCCGAATTCGGTACATTACCCCTGTTA <b>agggtaatca</b> AGGCCACTAGTGGA                                 | rad51    | 15  | 10  |
| 37 | AGAGCAGCAGCCGAATTCGGTACATTACCCCTGTTA <b>cgttaccct</b> GCATAGGCCACTAGTGGA                        | rad51    | 17  | 9   |
| 38 | AGCAGCAGCCGAATTCGGTACATTACCCCTGTTA <b>gatccattatccagatcca</b> TTATCCCTAGCGGCCGCATAGGCCACTAGT    | ku70     | 0   | 21  |
| 39 | GCAGCAGCCGAATTCGGTACATTACCCCTGTTA <b>tattat</b> TATCCCTAGCGGCCGCATAGGCCACTAGTG                  | ku70     | 0   | 5   |
| 40 | GCAGCAGCCGAATTCGGTACATTACCCCTGTTA <b>ggtaataaccctgttacattgt</b> TATCCCTAGCGGCCGCATAGGCCACTAGTG  | ku70     | 0   | 21  |
| 41 | GCAGCAGCCGAATTCGGTACATTACCCCTGTTA <b>accctgtacattaccctgtacat</b> TATCCCTAGCGGCCGCATAGGCCACTAGTG | ku70     | 0   | 23  |
| 42 | AGCAGCCGAATTCGGTACATTACCCCTGTTA <b>tatccctattattaccacattattat</b> CCTAGCGGCCGCATAGGCCACTAGTGGA  | ku70     | 0   | 26  |
| 43 | GAGCAGCAGCCGAATTCGGTACATTACCCCTGTTA <b>ttaca</b> TTATCCCTAGCGGCCGCATAGGCCACTAGT                 | ku70     | 1   | 5   |

|    |                                                                                                  |      |     |    |
|----|--------------------------------------------------------------------------------------------------|------|-----|----|
| 44 | AGCAGCCGAATTCGGTACATTACCCTGTTA <b>gcta</b> CTAGCGCCGCATAGGCCACTAGTGGATCT                         | ku70 | 3   | 4  |
| 45 | GCAGCCGAATTCGGTACATTACCCTGTTAT <b>aaca</b> GGCCGCATAGGCCACTAGTGGATCTGGATC                        | ku70 | 7   | 4  |
| 46 | GAGCAGCAGCCGAATTCGGTACATTACCCT <b>aacatta</b> TAGCGCCGCATAGGCCACTAGTGGATCTG                      | ku70 | 8   | 7  |
| 47 | AGAGCAGCAGCCGAATTCGGTACATTACC <b>ggta</b> CCGCCGCATAGGCCACTAGTGGATCTGGAT                         | ku70 | 12  | 4  |
| 48 | AGCAGCAGCCGAATTCGGTACATTACCCTG <b>catagggcataacataggc</b> CCGCATAGGCCACTAGTGGATCTGGATCCT         | ku70 | 13  | 19 |
| 49 | GTTTAGAGCAGCAGCCGAATTCGGTACATT <b>cggtac</b> AGCGCCGCATAGGCCACTAGTGGATCTGG                       | ku70 | 14  | 6  |
| 50 | GCCGAATTCGGTACATTACCCTGTTAGTTA <b>ccctgttacc</b> GCAGCTCGAACGTTAACGTTAACGTTAACGTT                | ku70 | 47  | 10 |
| 51 | GAGCAGCAGCCGAATTCGGTACATTACCCT <b>agagtaatgtacctacc</b> AAATAGAGGCGCTTCGTCGACGGAGCGTCA           | ku70 | 267 | 18 |
| 52 | CAATTTTTTTTTGAAACATTACCCTTAC <b>agggtta</b> CCTAGCGCCGCATAGGCCACTAGTGGATC                        | ku70 | 476 | 7  |
| 53 | AGCAGCCGAATTCGGTACATTACCCTGTTA <b>atgtaccctatgtacatta</b> FCCCTAGCGCCGCATAGGCCACTAGTGGGA         | lig4 | 0   | 19 |
| 54 | GCAGCCGAATTCGGTACATTACCCTGTTAT <b>tattatoccta</b> CCCTAGCGCCGCATAGGCCACTAGTGGAT                  | lig4 | 0   | 12 |
| 55 | GCAGCCGAATTCGGTACATTACCCTGTTAT <b>cctgttat</b> CCCTAGCGCCGCATAGGCCACTAGTGGAT                     | lig4 | 0   | 8  |
| 56 | GCAGCCGAATTCGGTACATTACCCTGTTAT <b>gtactatg</b> TAGCGCCGCATAGGCCACTAGTGGATCTG                     | lig4 | 3   | 8  |
| 57 | GCAGCCGAATTCGGTACATTACCCTGTTAT <b>gcgccctat</b> GCGCCGCATAGGCCACTAGTGGATCTGGA                    | lig4 | 5   | 9  |
| 58 | GCAGCCGAATTCGGTACATTACCCTGTTAT <b>aagtggccacattat</b> GCGCCGCATAGGCCACTAGTGGATCTGGA              | lig4 | 5   | 15 |
| 59 | GCAGCCGAATTCGGTACATTACCCTGTTAT <b>tatc</b> CCGCCGCATAGGCCACTAGTGGATCTGGAT                        | lig4 | 6   | 4  |
| 60 | GCAGCAGCCGAATTCGGTACATTACCCTGT <b>aattac</b> AGCGCCGCATAGGCCACTAGTGGATCTGG                       | lig4 | 7   | 6  |
| 61 | GCAGCAGCCGAATTCGGTACATTACCCTGT <b>caagcctgtca</b> AGCGCCGCATAGGCCACTAGTGGATCTGG                  | lig4 | 7   | 11 |
| 62 | AGCAGCCGAATTCGGTACATTACCCTGTTA <b>atgtatgtac</b> CCGCCGCATAGGCCACTAGTGGATCTGGAT                  | lig4 | 7   | 10 |
| 63 | GCAGCCGAATTCGGTACATTACCCTGTTAT <b>aagt</b> GGCCGCATAGGCCACTAGTGGATCTGGATC                        | lig4 | 7   | 4  |
| 64 | GCAGCCGAATTCGGTACATTACCCTGTTAT <b>taca</b> GGCCGCATAGGCCACTAGTGGATCTGGATC                        | lig4 | 7   | 4  |
| 65 | GCAGCCGAATTCGGTACATTACCCTGTTAT <b>aacag</b> GGCCGCATAGGCCACTAGTGGATCTGGATC                       | lig4 | 7   | 5  |
| 66 | GCAGCCGAATTCGGTACATTACCCTGTTAT <b>aacagt</b> GGCCGCATAGGCCACTAGTGGATCTGGATC                      | lig4 | 7   | 6  |
| 67 | GCAGCCGAATTCGGTACATTACCCTGTTAT <b>aacaggt</b> GGCCGCATAGGCCACTAGTGGATCTGGATC                     | lig4 | 7   | 8  |
| 68 | GCAGCCGAATTCGGTACATTACCCTGTTAT <b>aacaggtat</b> GGCCGCATAGGCCACTAGTGGATCTGGATC                   | lig4 | 7   | 10 |
| 69 | GCAGCCGAATTCGGTACATTACCCTGTTAT <b>aacatagtgtagt</b> GGCCGCATAGGCCACTAGTGGATCTGGATC               | lig4 | 7   | 13 |
| 70 | GCAGCCGAATTCGGTACATTACCCTGTTAT <b>aacaggtattaccct</b> GGCCGCATAGGCCACTAGTGGATCTGGATC             | lig4 | 7   | 15 |
| 71 | GCAGCCGAATTCGGTACATTACCCTGTTAT <b>aatgtaccctatgtaatgtatggccct</b> GGCCGCATAGGCCACTAGTGGATCTGGATC | lig4 | 7   | 28 |
| 72 | AGCAGCAGCCGAATTCGGTACATTACCCTG <b>cgcccta</b> AGCGCCGCATAGGCCACTAGTGGATCTGG                      | lig4 | 8   | 7  |
| 73 | AGCAGCCGAATTCGGTACATTACCCTGTTA <b>atgt</b> GGCCGCATAGGCCACTAGTGGATCTGGATC                        | lig4 | 8   | 4  |
| 74 | AGCAGCCGAATTCGGTACATTACCCTGTTA <b>ccctgt</b> GGCCGCATAGGCCACTAGTGGATCTGGATC                      | lig4 | 8   | 6  |
| 75 | AGCAGCCGAATTCGGTACATTACCCTGTTA <b>ccctgt</b> GGCCGCATAGGCCACTAGTGGATCTGGATC                      | lig4 | 8   | 6  |
| 76 | TAGAGCAGCAGCCGAATTCGGTACATTACC <b>gacattaca</b> CTAGCGCCGCATAGGCCACTAGTGGATCT                    | lig4 | 9   | 9  |
| 77 | GCAGCAGCCGAATTCGGTACATTACCCTGT <b>acat</b> GGCCGCATAGGCCACTAGTGGATCTGGATC                        | lig4 | 10  | 4  |
| 78 | GCAGCAGCCGAATTCGGTACATTACCCTGT <b>gggtaata</b> GGCCGCATAGGCCACTAGTGGATCTGGATC                    | lig4 | 10  | 8  |
| 79 | GCAGCAGCCGAATTCGGTACATTACCCTGT <b>ggccggtacatagtg</b> GCCGCATAGGCCACTAGTGGATCTGGATCC             | lig4 | 10  | 14 |
| 80 | AGCAGCCGAATTCGGTACATTACCCTGTTA <b>catac</b> CCGCATAGGCCACTAGTGGATCTGGATCCT                       | lig4 | 10  | 5  |
| 81 | GAGCAGCAGCCGAATTCGGTACATTACCCT <b>acctacattac</b> CCGCCGCATAGGCCACTAGTGGATCTGGAT                 | lig4 | 11  | 11 |
| 82 | GCAGCAGCCGAATTCGGTACATTACCCTGT <b>aatacctat</b> GCCGCATAGGCCACTAGTGGATCTGGATCC                   | lig4 | 11  | 9  |
| 83 | GCAGCAGCCGAATTCGGTACATTACCCTGT <b>acattac</b> CCGCATAGGCCACTAGTGGATCTGGATCCT                     | lig4 | 12  | 7  |
| 84 | TAGAGCAGCAGCCGAATTCGGTACATTACC <b>tcattacctat</b> GGCCGCATAGGCCACTAGTGGATCTGGATC                 | lig4 | 14  | 11 |
| 85 | GCAGCAGCCGAATTCGGTACATTACCCTGT <b>aggcct</b> GCATAGGCCACTAGTGGATCTGGATCCTCT                      | lig4 | 14  | 6  |
| 86 | TTAGAGCAGCAGCCGAATTCGGTACATTAC <b>tggatcacagggtaaatgt</b> GGCCGCATAGGCCACTAGTGGATCTGGATC         | lig4 | 15  | 18 |
| 87 | AGAGCAGCAGCCGAATTCGGTACATTACC <b>atgta</b> CCGCATAGGCCACTAGTGGATCTGGATCCT                        | lig4 | 15  | 5  |



|     |                                                                                                   |            |    |    |
|-----|---------------------------------------------------------------------------------------------------|------------|----|----|
| 88  | AGCAGCAGCCGAATTCGGTACATTACCTGccactagtgGCATAGGCCACTAGTGGATCTGGATCCTCT                              | lig4       | 15 | 9  |
| 89  | GCAGCAGCCGAATTCGGTACATTACCTGTaccgagggcctcgTAGGCCACTAGTGGATCTGGATCCTCTAGA                          | lig4       | 17 | 12 |
| 90  | TACGAAATGCGTCGTTTAGAGCAGCAGCCGggttaaggccgggctaagtGCCGCATAGGCCACTAGTGGATCTGGATCC                   | lig4       | 31 | 18 |
| 91  | GCAGCCGAATTCGGTACATTACCTGTTATcctattatCCCTAGCGCCGCATAGGCCACTAGTGGAT                                | rad51 ku70 | 0  | 8  |
| 92  | GCAGCCGAATTCGGTACATTACCTGTTATccattatccattatccattatcctaccattatCCCTAGCGCCGCATAGGCCACTAGTGGAT        | rad51 ku70 | 0  | 32 |
| 93  | GCAGCAGCCGAATTCGGTACATTACCTGTacattacattacattacattaccgggtacattatccaCTAGCGCCGCATAGGCCACTAGTGGATCT   | rad51 ku70 | 5  | 37 |
| 94  | GCAGCAGCCGAATTCGGTACATTACCTGTacattacattacattacattaccgggtacattatccaCTAGCGCCGCATAGGCCACTAGTGGATCT   | rad51 ku70 | 5  | 37 |
| 95  | GCAGCCGAATTCGGTACATTACCTGTTATcattacattatGGCCGCATAGGCCACTAGTGGATCTGGATC                            | rad51 ku70 | 7  | 11 |
| 96  | GCAGCCGAATTCGGTACATTACCTGTTATagggatatataatcggtatGGCCGCATAGGCCACTAGTGGATCTGGATC                    | rad51 ku70 | 7  | 20 |
| 97  | AGCAGCCGAATTCGGTACATTACCTGTTAacgggtaacgggtaacagtGGCCGCATAGGCCACTAGTGGATCTGGATC                    | rad51 ku70 | 8  | 19 |
| 98  | GCAGCAGCCGAATTCGGTACATTACCTGTaatgtaccacagggtaacatcgccacagggcctatgtGGCCGCATAGGCCACTAGTGGATCTGGATC  | rad51 ku70 | 10 | 36 |
| 99  | AGCAGCCGAATTCGGTACATTACCTGTTAacataacatagttaacattacatagttaatggcctatgCGCATAGGCCACTAGTGGATCTGGATCCTC | rad51 ku70 | 11 | 39 |
| 100 | AGCAGCAGCCGAATTCGGTACATTACCTGggttaattacCGCATAGGCCACTAGTGGATCTGGATCCT                              | rad51 ku70 | 13 | 9  |
| 101 | AGCAGCCGAATTCGGTACATTACCTGTTAggcccgatgGGCCACTAGTGGATCTGGATCCTCTAGAGTC                             | rad51 ku70 | 17 | 9  |
| 102 | TAATGAAAATAAGAGCTTGAGGGAAAAATcctatggccacctaataaggGCATAGGCCACTAGTGGATCTGGATCCTCT                   | rad51 ku70 | 77 | 19 |
| 103 | GCAGCCGAATTCGGTACATTACCTGTTAacgggccaacagggCGGCCGCATAGGCCACTAGTGGATCTGGATCCTGGA                    | rad51 lig4 | 5  | 13 |
| 104 | AGCAGCCGAATTCGGTACATTACCTGTTAatgctatGGGCCGCATAGGCCACTAGTGGATCTGGATCCTGGA                          | rad51 lig4 | 6  | 7  |
| 105 | GCAGCCGAATTCGGTACATTACCTGTTAacagccggcCGGCCGCATAGGCCACTAGTGGATCTGGATCCTGGA                         | rad51 lig4 | 6  | 10 |
| 106 | GCAGCCGAATTCGGTACATTACCTGTTActgttacctGGCCGCATAGGCCACTAGTGGATCTGGATCCTGGA                          | rad51 lig4 | 7  | 9  |
| 107 | GCAGCCGAATTCGGTACATTACCTGTTAagataGGCCGCATAGGCCACTAGTGGATCTGGATCCTGGA                              | rad51 lig4 | 7  | 5  |
| 108 | GCAGCCGAATTCGGTACATTACCTGTTAaacagGGCCGCATAGGCCACTAGTGGATCTGGATCCTGGA                              | rad51 lig4 | 7  | 5  |
| 109 | GCAGCCGAATTCGGTACATTACCTGTTAacattaccctGGCCGCATAGGCCACTAGTGGATCTGGATCCTGGA                         | rad51 lig4 | 7  | 10 |
| 110 | GAGCAGCAGCCGAATTCGGTACATTACCTAatgtacaTAGCGCCGCATAGGCCACTAGTGGATCTGGATCCTGGA                       | rad51 lig4 | 8  | 8  |
| 111 | AGCAGCCGAATTCGGTACATTACCTGTTAatgtatGGCCGCATAGGCCACTAGTGGATCTGGATCCTGGA                            | rad51 lig4 | 8  | 6  |
| 112 | AGCAGCCGAATTCGGTACATTACCTGTTAccctggGGCCGCATAGGCCACTAGTGGATCTGGATCCTGGA                            | rad51 lig4 | 8  | 6  |
| 113 | AGCAGCCGAATTCGGTACATTACCTGTTAagcataGGCCGCATAGGCCACTAGTGGATCTGGATCCTGGA                            | rad51 lig4 | 8  | 6  |
| 114 | AGCAGCCGAATTCGGTACATTACCTGTTAaggtagtGGCCGCATAGGCCACTAGTGGATCTGGATCCTGGA                           | rad51 lig4 | 8  | 7  |
| 115 | AGCAGCCGAATTCGGTACATTACCTGTTAaggtaatggccacatGGCCGCATAGGCCACTAGTGGATCTGGATCCTGGA                   | rad51 lig4 | 8  | 15 |
| 116 | AGCAGCCGAATTCGGTACATTACCTGTTAattaccgggtatagtgGGCCGCATAGGCCACTAGTGGATCTGGATCCTGGA                  | rad51 lig4 | 8  | 16 |
| 117 | GCAGCCGAATTCGGTACATTACCTGTTAgtatGCCGCATAGGCCACTAGTGGATCTGGATCCTGGA                                | rad51 lig4 | 8  | 4  |
| 118 | GCAGCCGAATTCGGTACATTACCTGTTAaacatacCGGCATAGGCCACTAGTGGATCTGGATCCTGGA                              | rad51 lig4 | 9  | 7  |
| 119 | AGCAGCCGAATTCGGTACATTACCTGTTAacaggggCGCATAGGCCACTAGTGGATCTGGATCCTGGA                              | rad51 lig4 | 11 | 7  |
| 120 | CAGCAGCCGAATTCGGTACATTACCTGTTAgggtCGCATAGGCCACTAGTGGATCTGGATCCTGGA                                | rad51 lig4 | 12 | 4  |
| 121 | AGAGCAGCAGCCGAATTCGGTACATTACCTgaataGGCCGCATAGGCCACTAGTGGATCTGGATCCTGGA                            | rad51 lig4 | 13 | 5  |
| 122 | AGAGCAGCAGCCGAATTCGGTACATTACCTgcatagtGGCCGCATAGGCCACTAGTGGATCTGGATCCTGGA                          | rad51 lig4 | 13 | 7  |
| 123 | AGAGCAGCAGCCGAATTCGGTACATTACCTgaattcgggtacatagtgGGCCGCATAGGCCACTAGTGGATCTGGATCCTGGA               | rad51 lig4 | 13 | 16 |
| 124 | TAGAGCAGCAGCCGAATTCGGTACATTACCTatagtGGCCGCATAGGCCACTAGTGGATCTGGATCCTGGA                           | rad51 lig4 | 14 | 5  |
| 125 | GCAGCAGCCGAATTCGGTACATTACCTGTaatgtATAGGCCACTAGTGGATCTGGATCCTCTAG                                  | rad51 lig4 | 16 | 5  |
| 126 | CGTCGTTTAGAGCAGCAGCCGAATTCGGTAttccactatGGGCCGCATAGGCCACTAGTGGATCTGGATCCTGGA                       | rad51 lig4 | 19 | 9  |
| 127 | TGCGTCGTTTAGAGCAGCAGCCGAATTCGGctagtGGCCGCATAGGCCACTAGTGGATCTGGATCCTGGA                            | rad51 lig4 | 23 | 5  |
| 128 | AGCAGCCGAATTCGGTACATTACCTGTTAcattaTCCCTAGCGCCGCATAGGCCACTAGTGGATCCTGGA                            | polQ       | 0  | 5  |
| 129 | GCAGCCGAATTCGGTACATTACCTGTTAagcggtaCTAGCGCCGCATAGGCCACTAGTGGATCTGGATCCTGGA                        | polQ       | 2  | 7  |
| 130 | AGCAGCCGAATTCGGTACATTACCTGTTAccctGGCCGCATAGGCCACTAGTGGATCTGGATCCTGGA                              | polQ       | 8  | 4  |
| 131 | GCAGCAGCCGAATTCGGTACATTACCTGTaatgtactagtGGCCGCATAGGCCACTAGTGGATCTGGATCCTGGA                       | polQ       | 10 | 11 |
| 132 | AGAGCAGCAGCCGAATTCGGTACATTACCTgaataataaccCGGCCGCATAGGCCACTAGTGGATCTGGATCCTGGA                     | polQ       | 12 | 10 |

**Supplemental Table S8.** Sequences and genotypes of all repair products with net insertions of  $\geq 4$  bp. Inserted sequence is boxed and in lowercase. Notational conventions as for Table S2.
